## RESEARCH ARTICLE

# *In vitro* safety evaluation of dopamine D<sub>3</sub>R antagonist, *R*-VK4-116, as a potential medication for the treatment of opioid use disorder

Rahul M. Nandre<sup>1</sup>, Amy Hauck Newman<sup>2</sup>, Pramod S. Terse<sup>1\*</sup>

**1** Therapeutic Development Branch, Division of Preclinical Innovation, National Center for Advancing Translational Sciences, National Institute of Health, Rockville, Maryland, United States of America,

**2** Medicinal Chemistry Section, Molecular Targets and Medications Discovery Branch, National Institute on Drug Abuse—Intramural Research Program, National Institute of Health, Baltimore, Maryland, United States of America

\* [tersep@mail.nih.gov](mailto:tersep@mail.nih.gov)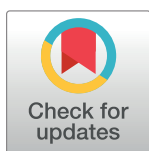**OPEN ACCESS**

**Citation:** Nandre RM, Newman AH, Terse PS (2024) *In vitro* safety evaluation of dopamine D<sub>3</sub>R antagonist, *R*-VK4-116, as a potential medication for the treatment of opioid use disorder. PLoS ONE 19(12): e0315569. <https://doi.org/10.1371/journal.pone.0315569>

**Editor:** Pavle Randjelovic, University of Nis Faculty of Medicine: Univerzitet u Nisu Medicinski Fakultet, SERBIA

**Received:** April 18, 2024

**Accepted:** November 20, 2024

**Published:** December 16, 2024

**Copyright:** This is an open access article, free of all copyright, and may be freely reproduced, distributed, transmitted, modified, built upon, or otherwise used by anyone for any lawful purpose. The work is made available under the [Creative Commons CC0](https://creativecommons.org/licenses/by/4.0/) public domain dedication.

**Data Availability Statement:** All relevant data are within the manuscript and its [Supporting Information](#) files.

**Funding:** This work was supported by the intramural program of the National Center for Advancing Translational Sciences (NCATS) as part of the Helping to End Addiction Long-term (HEAL) initiative, NIH Contract No. HHSN271201700014I, as well as National Institute on Drug Abuse-

## Abstract

*R*-VK4-116 is currently being developed as a medication to treat opioid use disorder (OUD). To characterize *in vitro* safety properties of *R*-VK4-116, metabolic stability in hepatocytes or liver microsomes, metabolite identification, metabolism/transporter-mediated drug interactions, lysosomal perturbation, mitochondrial toxicity, off-target enzyme effects, cellular and nuclear receptor functional assays, electrophysiological assays, CiPA, KINOMEscan<sup>TM</sup>, plasma protein binding, phospholipidosis and steatosis assays were performed. Overall, *R*-VK4-116 was metabolically stable in hepatocytes and microsomes. Four major metabolites were detected: two mono-oxidation products, one di-oxidation product, and one demethylated plus di-oxidation product. CYP2D6 and CYP3A4 were major contributors in *R*-VK4-116 metabolism. Further, *R*-VK4-116 did not induce/inhibit CYP enzymes. However, *R*-VK4-116 inhibited BCRP/P-gp, and showed antagonist effects on  $\alpha$ 1A(*h*), H1(*h*) and agonist effect on hGABAA $\infty$ 1 $\beta$ 2 $\gamma$ 2 at 10  $\mu$ M. *R*-VK4-116 inhibited hERG and Kir2.1 at a high concentration of 100  $\mu$ M. KINOMEscan<sup>TM</sup> provided 5 hits (CHEK2, HPK1, MARK3, SRPK2 and TNK1) with K<sub>d</sub>s of >10  $\mu$ M. Further, *R*-VK4-116 was bound to human, rat and dog plasma proteins (~83–93%). *R*-VK4-116 did not induce lysosome perturbation, mitochondrial toxicity, phospholipidosis, or steatosis at  $\leq$ 10  $\mu$ M. These results demonstrated that *R*-VK4-116 possesses favorable *in vitro* safety properties and supports further development as a potential medication for OUD.

## Introduction

Drug overdose deaths, largely fueled by the synthetic opioid fentanyl, continue to escalate in the United States, with >100,000 fatalities per year since 2021 (<https://nida.nih.gov/research-topics/trends-statistics/overdose-death-rates>). To address the opioid crisis, the National

Intramural Research Program Z1A DA000424 (AHN).

**Competing interests:** None of the authors of this paper has a financial or personal relationship with other people or organizations that could inappropriately influence or bias the content of the paper.

Institute on Drug Abuse (NIDA) proposed a list of highest priority pharmacological targets for medication development [1]. Among these, the dopamine D<sub>3</sub>R (D<sub>3</sub>R) was one of the highlighted targets [2]. Although D<sub>3</sub>R has been a target for the development of medications to treat various substance use disorders, poor absorption, distribution, metabolism and excretion (ADME), or cardiotoxicity in experimental animals of earlier developed D<sub>3</sub>R antagonist, especially in the presence of cocaine, prevented successful clinical transition [3, 4].

*R*-VK4-116 (*N*-(4-(4-(3-chloro-5-ethyl-2-methoxyphenyl)piperazin-1-yl)-3-hydroxybutyl)-1H-indole-2-carboxamide) was first reported in 2016 as a highly selective D<sub>3</sub>R antagonist [5]. *R*-VK4-116 (5, 15 and 25 mg/kg) decreased oxycodone self-administration, suppressed oxycodone-enhanced dopamine-dependent optical brain stimulation reward, dose-dependently diminished conditioned place aversion induced by naloxone-precipitated opioid withdrawal, as well as enhancing oxycodone-induced analgesia in rodents [6]. It was also effective in reducing dose escalation of oxycodone as well as reducing withdrawal-associated hyperalgesia in both male and female rats at 5, 15 and 25 mg/kg [7] supporting its further development. Resolution of the enantiomers of (±)VK4-116, demonstrated *R*-VK4-116 to be the eutomer at D<sub>3</sub>R [8]; this compound (up to 25 mg/kg) did not potentiate the cardiovascular effects of either cocaine or oxycodone in rats [9].

In order to further consider *R*-VK4-116 as a potential clinical candidate, we evaluated its metabolic stability in hepatocytes or liver microsomes, and metabolites were identified. Further, metabolism and transporter-mediated drug interaction assays were performed. In addition, *R*-VK4-116 was evaluated for lysosomal perturbation, mitochondrial toxicity, oxidative stress and apoptosis potential in HepG2, off-target enzyme effects, cellular and nuclear receptor functional assays, electrophysiological assays, CiPA, KINOME<sup>TM</sup> profiling, plasma protein binding, phospholipidosis and steatosis. The results of *in vitro* exploratory studies suggest a low potential of *R*-VK4-116 to cause off-target toxicity.

## Materials and methods

### Test article and cells

*R*-VK4-116 (lot no. TRND00600611-03; synthesized with purity 99.16% at NCATS, NIH, and lot no. 14853-C-R0-01-55-01; synthesized with purity 97.9% at Curia, NY) was prepared as a 10 mM stock in DMSO and stored at -20°C. The stock of TRND00600611-03 (*R*-VK4-116-2HCl) was diluted appropriately for all assays except CYP phenotyping and SLC transporter mediated assays. Lot number 14853-C-R0-01-55-01 (*R*-VK4-116-HCl) stock was diluted appropriately to conduct CYP phenotyping and SLC transporter mediated assays. CryostaX<sup>®</sup> pooled mixed gender human (5 male and 5 female) hepatocytes, Male Sprague Dawley (Total 7) rat hepatocytes, Male Beagle dog (Total 3) hepatocytes (XenoTech, LLC, Kansas City, KS) were used for cell-based assays. All assays were repeated.

### Metabolic stability in hepatocyte

To evaluate metabolic stability, *R*-VK4-116 (0.5 and 10 μM) was incubated in duplicate with human, rat and dog hepatocytes (1 × 10<sup>6</sup> cells/ml of OptiIncubate media) in suspension, respectively (n = 2 at each time point). *R*-VK4-116 was also incubated in the absence of hepatocytes (n = 6 at each time point) to give information about stability and non-specific binding during the experiment (Table A in S1 File). Reactions were terminated by removing 50 μl aliquots at selected time points (0, 30, 60, 90 and 120 min) and mixing with 200 μl of acetonitrile (Mallinckrodt Baker, Inc, Phillipsburg, NJ) containing ethyl nicotinate (Sigma-Aldrich, St Louis, MO) as internal standard. CYP3A4 substrate Midazolam (10 μM) was prepared and incubated in the same manner. Following brief centrifugation, the supernatants were further

diluted (10- and 100-fold for 0.5  $\mu$ M and 10  $\mu$ M *R*-VK4-116 samples ( $n = 2$  at each time point), respectively; 100-fold for 10  $\mu$ M midazolam samples ( $n = 6$  at each time point)) with acetonitrile:water:formic acid (25:75:0.2, v/v/v), and analyzed by LC-MS/MS. In addition, *in vitro* half-life ( $t_{1/2}$ , min) and intrinsic clearance ( $CL_{\text{int}}$ ,  $\mu\text{l}/\text{min}/10^6$  cells) were calculated [10, 11].

### Metabolic stability and metabolite identification in liver microsomes

To evaluate metabolic stability, *R*-VK4-116 (1 and 10  $\mu$ M) was incubated in duplicate with human, rat, dog, or monkey liver microsomes (0.5 mg/ml) (XenoTech, LLC, Kansas City, KS) ( $n = 2$  at each time point) and appropriate cofactors (2.5 mM NADPH and 3.3 mM  $\text{MgCl}_2$ ) in 100 mM phosphate buffer, pH 7.4, in a 37°C water bath. Reactions were stopped by removing 100  $\mu\text{l}$  aliquots at selected time points (0, 30, 60, 90 and 120 min) and mixing with 200  $\mu\text{l}$  of acetonitrile containing ethyl nicotinate as internal standard. Following brief centrifugation, the 1 and 10  $\mu$ M *R*-VK4-116 samples were diluted 10- and 100-fold, respectively, then analyzed by LC-MS/MS. Appropriate controls were included such as incubation of 1 and 10  $\mu$ M *R*-VK4-116 with heat-inactivated (HI) microsomes (0.5 mg protein/ml) for 0 and 120 min ( $n = 2$  at each time point), and incubation of 10  $\mu$ M midazolam with all incubation components (0, 30, 60, 90 and 120 min) or with HI microsomes for 0 and 120 min ( $n = 2$  at each time point).

To detect major metabolites, microsomal samples were prepared with incubation of 10  $\mu$ M *R*-VK4-116 with the same incubation conditions as for the metabolic stability analysis. Reactions were stopped by removing 100  $\mu\text{l}$  aliquots at 120 min and mixing with 200  $\mu\text{l}$  of acetonitrile. Following brief vortexing and centrifugation, the supernatant was transferred to an HPLC vial fitted with a 300  $\mu\text{l}$  glass insert for metabolite analysis using a Sciex 4000QTrap mass spectrometer. Appropriate controls were included such as incubation of all reaction components except *R*-VK4-116 and incubation of 10  $\mu$ M *R*-VK4-116 with either HI microsomes or lacking NADPH at 0 and 120 min.

### CYP phenotyping

CYP phenotyping involved the identification of CYP isoforms, which involved in the metabolism of *R*-VK4-116 using recombinant CYP1A2, CYP2B6, CYP2C8, CYP2C9, CYP2C19, CYP2D6, and CYP3A4 (XenoTech, LLC, Kansas City, KS), followed by determination of the  $K_m$  and  $V_{\text{max}}$  for the metabolites formed by the major CYP isoforms [12]. *R*-VK4-116 (1  $\mu$ M) was incubated in duplicate with each CYP isoform individually, control bacosomes (XenoTech, LLC, Kansas City, KS), or human liver microsomes (200-donor mixed gender; XenoTech, LLC, Kansas City, KS), and cofactors (2.5 mM NADPH and 3.3 mM  $\text{MgCl}_2$ ) in 0.1 M phosphate buffer, pH 7.4, in a 37°C water bath. In addition, *R*-VK4-116 was also incubated with all components in the absence of NADPH. Aliquots (100  $\mu\text{l}$ ) were removed at 0, 15, 30, 60, 90, and 120 min, and mixed with 200  $\mu\text{l}$  of acetonitrile containing ethyl nicotinate as internal standard (IS). Following brief vortexing and centrifugation, 50  $\mu\text{l}$  of supernatant was mixed with 450  $\mu\text{l}$  of 25:75:0.2 acetonitrile/water/formic acid for analysis by LC-MS/MS to determine the remaining *R*-VK4-116 at each time point based on peak area ratio (PAR) of *R*-VK4-116 to IS. As a positive control, the known substrate of each individual CYP isoform (phenacetin for CYP1A2, bupropion for CYP2B6, paclitaxel for CYP2C8, diclofenac for CYP2C9, diazepam for CYP2C19, bufuralol for CYP2D6, and testosterone for CYP3A4) was also incubated.

### CYP induction and inhibition

An upfront and concurrent test to assess the toxicity potential of the *R*-VK4-116 to human hepatocytes was conducted using the 3-[4, 5-Dimethyl-2-thiazolyl]-2,5-diphenyl-2H-

tetrazolium bromide (MTT) assay. The subsequent study was designed to assess the potential of *R*-VK4-116 (0.01, 0.1, 1, 3, 5 and 10  $\mu$ M) to induce CYP isoforms 1A2, 2B6 and 3A4 mRNA and *in situ* catalytic activity using primary cultured human hepatocytes with 48-hr incubation [12–15]. Rifampicin as a positive control and solvent (0.1% DMSO) vehicle control were also included. The acceptance criteria for CYP induction was  $\geq 2$ -fold induction for significant CYP activity, while the acceptance criteria for CYP mRNA was  $\geq 4$ -fold for significant CYP induction.

To determine the potential for CYP450 inhibition, *R*-VK4-116 was incubated at 0.1, 0.3, 1, 3, 10, 30, 60 and 100  $\mu$ M with human liver microsomes, cofactors, and specific CYP probe substrates for 20 min. Positive control compounds that are known to inhibit specific CYP isoforms were also included and incubated in the same manner as *R*-VK4-116. Samples were analyzed by LC-MS/MS. The percent CYP activity in the test article or specific inhibitor samples relative to the control samples (not containing *R*-VK4-116/inhibitors) was calculated as follows:

$$\begin{aligned} & \% \text{ CYP activity} \\ & = \left( \frac{\text{Substrate metabolite response, PAR in the presence of inhibitor or test article}}{\text{Substrate metabolite mean PAR in Control}} \right) \times 100 \end{aligned}$$

If CYP activity was less than 70% of the control, the significant inhibition of CYP enzyme activity in the presence of *R*-VK4-116 was considered.

### Transporter mediated assay

To assess the potential for *R*-VK4-116 to be a substrate or inhibitor of human ABC (BCRP, P-gp) and SLC (OAT1, OAT3, OCT2, OATP1B1, OATP1B3, MATE1, and MATE2-K) mediated transporters, the uptake test system for each transporter was a polarized monolayer of MDCK-II cells grown on permeable supports [12]. The MDCK-II cells were treated to express the transporter of interest. The transport of each probe substrate was determined by radiometric detection (Fig 1 in S1 File). *R*-VK4-116 was quantified by LC/MS/MS. For the uptake assay, the net transporter-mediated uptake-rate (V) of the substrate by each SLC transporter was calculated as follows:

$$\begin{aligned} & \text{Transporter-mediated uptake rate (pmol/min/cm}^2\text{)} \\ & = \frac{(\text{Cellular accumulation in cells expressing the transporter}) - (\text{Mean cellular accumulation in control cells})}{\text{Surface area} \times \text{incubation time}} \end{aligned}$$

Fold of activity and percent inhibition were determined as follows:

$$\text{Fold of activity} = \frac{(\text{Mean uptake rate})_{\text{transporter expressing cells}}}{(\text{Mean uptake rate})_{\text{control cells}}}$$

$$\text{Percent inhibition} = 100 - 100 \times \frac{(\text{Transport-mediated uptake rate})_{\text{with inhibitor}}}{(\text{Transport-mediated uptake rate})_{\text{vehicle control}}}$$

For BCRP and P-gp, the apparent permeability  $P_{app}$  and Efflux Ratio (ER) were calculated [16]. Net basal (B) to apical (A) flux ( $B \rightarrow A$ ) of the substrate transport (pmol/min/cm<sup>2</sup>) by BCRP or P-gp was calculated by subtracting  $A \rightarrow B$  flux from  $B \rightarrow A$  flux.

Percent inhibition was calculated by dividing the ER in the presence of *R*-VK4-116 or the reference inhibitor by the ER in the absence of the inhibitor:

$$\text{Percent inhibition} = 100 - \left[ 100 \times \left( \frac{(ER - 1)_{\text{with inhibitor}}}{(\text{mean ER} - 1)_{\text{without inhibitor}}} \right) \right]$$

### Lysosomal trapping assay

To determine the lysosomal perturbation potential of *R*-VK4-116, Lyso-ID Red Cytotoxicity kit, Enzo Sciences (Farmingdale, NY), Lot #03281735D was used with the manufacturer's instructions. Briefly, the HepG2 cells seeded in 96-well plates were incubated with *R*-VK4-116 (0.1, 1.0, and 10.0 μM) for 24, 48 and 72 hr. Positive control verapamil (10, 100, and 200 μM) and negative control piroxicam were also included (Fig 2 in [S1 File](#)). After incubation timepoint, the treated cells were washed and incubated with fluorescent dual color detection reagent for 60 min. Subsequently, the fluorescence was measured with Spectra-max ID5. An increase in red signal without significant loss (no more than 30%) of the blue signal indicates the accumulation of test article within the cells arising from an increase in lysosome or lysosome-like vesicles in size and/or number. The assay results were presented as fluorescence fold change for red stain and blue stain individually and were calculated as follows:

$$\text{Fluorescence fold change} = \frac{\text{Relative Fluorescence Unit (RFU) measured for test article concentration}}{\text{RFU measured for respective solvent control}}$$

The acceptance criteria for significant lysosomal perturbation was a  $\geq 2$ -fold increase in red fluorescence with no loss of blue fluorescence.

### Mitochondrial toxicity (MT) assay

Evaluation of the MT potential of *R*-VK4-116 was a two-step process. In the first step, the HepG2 cells were incubated with *R*-VK4-116 (0.001, 0.01, 0.1, 1, 10, 50 and 100 μM) for 24-, 48- and 72-hr to conduct cytotoxicity potential using MTT assay. The assay results were presented as % cell viability. In the second step, the MT potential was evaluated by treating HepG2 cells with *R*-VK4-116 (0.1, 1 and 10 μM) for 7- and 14-days of incubation. After each incubation, the cells were harvested and lysed to test the MT assay panel. The Zalcitabine (positive control) was also included in this assay (Fig 3 in [S1 File](#)). The levels of Mitochondrial Oxidative Phosphorylation (OXPHOS) complex 1 (NADH dehydrogenase; ab178011, lot #GR3339973-1), complex 3 (CytC reductase; ab124537, lot #GR3276896-3), complex 4 (CytC Oxidase; ab179880, lot #GR3273194-1), and complex 5 (ATP synthase; ab124539, lot #GR3267780-4) in the cell lysates were determined using respective indirect ELISA as per manufacturer's instructions [17]. The total ATP content of the cell lysates was determined using an ATP assay kit (ab83355, lot #GR3314128-2, Abcam, Cambridge, MA) [18]. The Caspase 3 content of the cell lysates was determined using the Caspase-3 assay kit (ab39401, lot #GR3322733-1, Abcam, Cambridge, MA) [19]. In addition, the total glutathione content was determined using the total glutathione (GSSG/GSH) assay kit (STA-312, lot #09100263, Oxiselect™, San Diego, CA) [20]. Using an Oxiselect™ ROS/RNS assay kit (STA-347, lot #7081343, Cell Biolabs Inc. San Diego, CA), the ROS/RNS content of the cell lysates was determined by fluorescence assay [21].

## Off-target enzyme effects, receptor functional assays and electrophysiological assays

The purpose of this study was to provide a first step in preliminary safety assessments by providing early identification of potential off-target interactions for the optimization of safety margins. This study was conducted by Eurofins Cerep (France) and Eurofins Discovery (St. Charles, MO). *R*-VK4-116 was tested in enzyme and uptake assay with 10 enzyme targets (Figs 4 and 5 in [S1 File](#)), and cellular and nuclear receptor functional assays with 24 receptor targets (Figs 5 and 6 in [S1 File](#)). Compound enzyme inhibition effect was calculated as a % inhibition of control enzyme activity. The cellular agonist effect was calculated as a % of the control response to a known reference agonist for each target, and the cellular antagonist effect was calculated as a % inhibition of the control reference agonist response for each target.

Electrophysiological assays were also conducted to profile *R*-VK4-116 for activities on ion channel targets. The QPatch HT (patch clamp) measured the agonist or antagonist activity of *R*-VK4-116 on ion channels. For these assays, the voltage was used as the ligand to activate the channel and induce a measurable current. The IonFlux HT measured the agonist, antagonist, or PAM activity of *R*-VK4-116 on ligand-gated ion channels. For these assays, GABA or Acetylcholine (ACh) was used as the ligand to activate the channel and induce measurable current. The six ion channels tested at 10  $\mu$ M of *R*-VK4-116 in replicate were hNav1.5 Peak, hERG, hKCNQ1/minK, hCav1.2, hGABAA $\alpha$ 1/ $\beta$ 2g2 and hnAChR $\alpha$ 4/ $\beta$ 2.

## Comprehensive *in vitro* proarrhythmia assay (CiPA)

To evaluate proarrhythmic risk, *R*-VK4-116 (0.01, 0.1, 1, 10 and 100  $\mu$ M) was tested in eight IonChannelProfiler™ Cardiac Panel Assays. Electrophysiological assays were conducted to profile *R*-VK4-116 for activities on the ion channel targets: Voltage-Gated Sodium: Nav1.5 (Peak), Voltage-Gated Potassium: hERG, KCNQ1/minK, Kv4.3/KChIP2, Kv1.5 Voltage-Gated Calcium: Cav1.2, Inward-Rectifying Voltage-Gated Potassium: Kir2.1 and Hyperpolarization-Activated Cyclic Nucleotide-Gated Potassium: HCN4 using the QPatch electrophysiological platform.

## KINOME™ profiling

KINOME™ profiling was done to quantitatively measure the interaction between *R*-VK4-116 and 403 non-mutant human kinases for screening off-target kinase activity. Briefly, *E. coli* host derived from the BL21 strain were grown to log-phase and infected with kinase-tagged T7 phage and incubated with shaking at 32°C until lysis. The lysates were centrifuged and filtered to remove cell debris. The remaining kinases were produced in HEK-293 cells and subsequently tagged with DNA for qPCR detection. Streptavidin-coated magnetic beads were treated with biotinylated small molecule ligands to generate affinity resins for kinase assays. The liganded beads were blocked with excess biotin and washed to remove unbound ligand and to reduce non-specific phage binding. To determine the small molecule (*R*-VK4-116) selectivity, the binding reactions were assembled by combining kinases, liganded affinity beads, and *R*-VK4-116 in 1x binding buffer [22]. *R*-VK4-116 was screened, and results for primary screen binding interactions were reported as '% Ctrl', where lower numbers indicated stronger hits in the matrix. Selectivity Score (S-score) was a quantitative measure of compound selectivity. It was calculated by dividing the number of kinases that compounds bind by the total number of distinct kinases tested, excluding mutant variants [22, 23]. The binding constants (K<sub>d</sub>s) were also determined with a standard dose-response curve using the Hill equation and Levenberg-Marquardt algorithm [24, 25].

## Plasma protein binding

The gel filtration used solid-phase extraction columns containing hydrated gel filtration beads (Sephadex G-25). *R*-VK4-116 (0.5 and 1.0  $\mu$ M) was prepared in human, rat or dog plasma (final non-plasma matrix 1%), incubated at 37°C for 2 hr, and then determined the binding of *R*-VK4-116 to plasma protein by Sephadex G-25 gel filtration. In this method, the amount of analyte accompanying the proteins (i.e., protein-bound *R*-VK4-116) before and after filtration was assayed for analyte concentration by LC-MS/MS.

## Phospholipidosis and steatosis

To assess the potential of *R*-VK4-116 ( $\leq 100$   $\mu$ M) to cause phospholipidosis and steatosis in HepG2 cells, this study measured the effects of *R*-VK4-116 on the accumulation of phospholipids in the lysosomes of the cells and accumulation of fat in the cells, as well as mechanisms of toxicity as demonstrated by cell count, nuclear size, and DNA structure measurements using high content screening. Sertraline was included as a positive control for phospholipidosis, and tamoxifen was included as a positive control for steatosis.

## Statistical analysis

The data analysis and the figures were generated using GraphPad Prism Version 8.3 (GraphPad Software, San Diego CA). ViiA<sup>™</sup>7 v1.2.3 software (Applied Biosystems) was used for PCR data analysis. Analyst<sup>®</sup> software v1.6.2 (Applied Biosystems) was used for LC-MS/MS data analysis. In the transporter mediated assay and MT assay, data were analyzed using Student's *t*-test, where *p*-value <0.05 was statistically significant.

## Results

### Metabolic stability of *R*-VK4-116 in hepatocytes

Overall, *R*-VK4-116 (0.5 and 10  $\mu$ M) was metabolically stable in human, rat, or dog hepatocytes. Although, some trend of metabolism was observed after 120 min of incubation at 0.5  $\mu$ M, it was not substantial if compared to the stability of *R*-VK4-116 in the absence of hepatocytes after 120 min (Table 1; Fig 1). In the non-specific binding experiment, *R*-VK4-116 showed no significant loss after 5 min of incubation based on the pre-incubation conditions (Table A in S1 File).

*In vitro*  $t_{1/2}$  and  $CL_{int}$  of *R*-VK4-116 are presented in Table 2. For *R*-VK4-116, human, rat, and dog hepatocytes showed similar  $t_{1/2}$  (~91 to 117 min at 0.5  $\mu$ M and ~169 to 347 min at 10  $\mu$ M), and  $CL_{int}$  (~12 to 16  $\mu$ l/min/ $10^6$  cells at 0.5  $\mu$ M and ~4 to 8  $\mu$ l/min/ $10^6$  cells at 10  $\mu$ M).

### Metabolic stability and metabolite identification of *R*-VK4-116 in liver microsomes

The metabolism of *R*-VK4-116 was observed in human, rat, dog, or monkey liver microsomes after 30 min of exposure (Table 3; Fig 2). The extent of metabolism was as follows: 16.4%, 37.5%, 19.7%, and 15.0% remaining following 120 min exposure of 1  $\mu$ M *R*-VK4-116 with human, rat, dog, and monkey microsomes, respectively; and 48.9%, 69.4%, 49.9%, and 39.7% remaining for 10  $\mu$ M *R*-VK4-116, respectively. When incubated with HI microsomes, there was no significant decrease in *R*-VK4-116 after 120 min. Table 3 also presented the results for the positive control midazolam, which were consistent with expected values, demonstrating the integrity of the assay.

**Table 1. Metabolism of R-VK4-116 and positive control, midazolam using human, rat, and dog hepatocytes and in the absence of hepatocytes (% remaining Vs T = 0 min; mean).**

| Species <sup>a</sup>        | Time (min.) | 0.5 $\mu$ M R-VK4-116 | 10 $\mu$ M R-VK4-116 | 10 $\mu$ M Midazolam |
|-----------------------------|-------------|-----------------------|----------------------|----------------------|
| Human                       | 0           | 100.0                 | 100.0                | 100.0                |
|                             | 30          | 89.1                  | 93.2                 | 91.7                 |
|                             | 60          | 78.4                  | 85.5                 | 85.3                 |
|                             | 90          | 65.4                  | 78.9                 | 80.7                 |
|                             | 120         | 48.1                  | 79.7                 | 72.4                 |
| Rat                         | 0           | 100.0                 | 100.0                | 100.0                |
|                             | 30          | 85.0                  | 95.8                 | 89.0                 |
|                             | 60          | 55.6                  | 92.5                 | 77.8                 |
|                             | 90          | 42.4                  | 66.7                 | 70.5                 |
|                             | 120         | 42.5                  | 64.6                 | 65.7                 |
| Dog                         | 0           | 100.0                 | 100.0                | 100.0                |
|                             | 30          | 71.2                  | 85.3                 | 66.6                 |
|                             | 60          | 61.2                  | 85.5                 | 50.8                 |
|                             | 90          | 45.4                  | 80.3                 | 31.2                 |
|                             | 120         | 40.1                  | 76.4                 | 19.5                 |
| No hepatocytes <sup>b</sup> | 0           | 100.0                 | 100.0                | 100.0                |
|                             | 30          | 86.2                  | 92.9                 | 97.7                 |
|                             | 60          | 81.6                  | 87.5                 | 97.6                 |
|                             | 90          | 79.9                  | 87.9                 | 98.6                 |
|                             | 120         | 78.4                  | 77.3                 | 98.5                 |

<sup>a</sup>Suspension of hepatocytes of each species (human, rat and dog) was used in duplicate. The data is presented in mean.

<sup>b</sup>No hepatocytes were used. The results were presented in the mean of six sample results.

<https://doi.org/10.1371/journal.pone.0315569.t001>

The relative PAR of the metabolites in the human, rat, dog, and monkey microsomes were shown in Table 4 to visualize the metabolites. The resulting metabolites were consistently detected in metabolic stability samples but not in controls. As seen in Table 4, four metabolites of R-VK4-116 have detected: two mono-oxidation products (M3 and M4), one di-oxidation product (M1), and one demethylated plus di-oxidation product (M2) metabolites. Similar metabolite profile (M2, M3 and M4) was seen in human and dog. Metabolite profile to some extent (M3) was also similar in human and rat. However, monkey showed different metabolite (M1).

## CYP phenotyping

In the CYP phenotyping reaction, the greatest decrease of R-VK4-116 was observed when incubated with CYP2D6 and CYP3A4, with 40.6 and 25.6% remaining, respectively, at 120

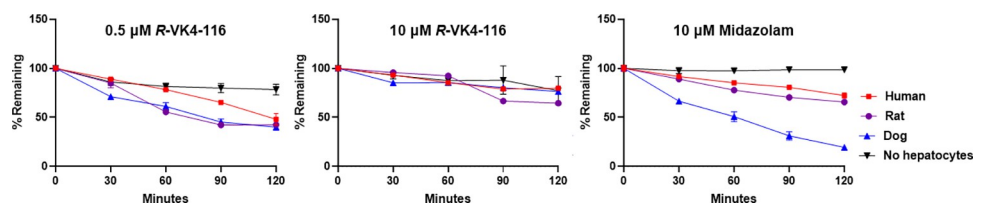

**Fig 1. Metabolism of R-VK4-116 and positive control, midazolam using human, rat, and dog hepatocytes and in the absence of hepatocytes (% remaining Vs minutes; mean).**

<https://doi.org/10.1371/journal.pone.0315569.g001>



**Table 2. In vitro half-life ( $t_{1/2}$ ) and intrinsic clearance ( $Cl_{int}$ ) of R-VK4-116 and positive control, midazolam using human, rat and dog hepatocytes.**

| Species | 0.5 $\mu$ M R-VK4-116 |                                      | 10 $\mu$ M R-VK4-116 |                                      | 10 $\mu$ M Midazolam |                                      |
|---------|-----------------------|--------------------------------------|----------------------|--------------------------------------|----------------------|--------------------------------------|
|         | $t_{1/2}$ , min       | $Cl_{int}$ $\mu$ L/min/ $10^6$ cells | $t_{1/2}$ , min      | $Cl_{int}$ $\mu$ L/min/ $10^6$ cells | $t_{1/2}$ , min      | $Cl_{int}$ $\mu$ L/min/ $10^6$ cells |
| Human   | 117                   | 11.8                                 | 338                  | 4.1                                  | 267                  | 5.2                                  |
| Rat     | 86.6                  | 16.0                                 | 169                  | 8.2                                  | 193                  | 7.2                                  |
| Dog     | 91.2                  | 15.2                                 | 347                  | 4.0                                  | 51.3                 | 27.0                                 |

<https://doi.org/10.1371/journal.pone.0315569.t002>

min. Minimal to no metabolism was observed with the other CYP isoforms. A preliminary investigation of the metabolites formed resulted in the detection of three metabolites, two at a molecular mass of 500 (+16 amu, most likely hydroxylation of parent) and one at a molecular mass of 498 (+14 amu). Based on the PAR of metabolite to IS, one of the +16 metabolites appeared to be the major metabolite (M1), while the other two were minor metabolites (M2 and M3).

The  $K_m$  for the formation of M1, M2, and M3 by CYP2D6 was determined to be 0.20, 0.13, and 0.13  $\mu$ M, respectively, while the  $V_{max}$  was 0.60, 0.18, and 0.09 (PAR of metabolite to IS), respectively (Table 5 and Fig 3). The  $K_m$  for the formation of M1, M2, and M3 by CYP3A4 was determined to be 0.25, 0.09, and 0.10  $\mu$ M, respectively, while the  $V_{max}$  was 0.28, 0.03, and 0.02 (PAR of metabolite to IS), respectively (Table 5 and Fig 3).

### CYP induction and inhibition

Due to the potential cytotoxicity of 30  $\mu$ M R-VK4-116 in the initial MTT assay (Table B in S1 File), the highest concentration for the induction assay was reduced to 10  $\mu$ M. For the concurrent MTT assay, no decrease of hepatocyte viability was measured in response to  $\leq$  10  $\mu$ M R-VK4-116 in hepatocytes (Table C in S1 File).

Treatment of hepatocytes with R-VK4-116 (0.01 to 10  $\mu$ M) for two days resulted neither in induction in CYP1A2 nor in CYP2B6 mRNAs and activities (Tables D-G in S1 File). However, treatment of hepatocytes with R-VK4-116 (0.01 to 10  $\mu$ M) for two days resulted in a slight

**Table 3. Metabolic stability of R-VK4-116 and positive control, midazolam using human, rat, dog and monkey liver microsomes (% remaining Vs minutes; mean).**

| Species   | Time (min.) | 1 $\mu$ M R-VK4-116 | 10 $\mu$ M R-VK4-116 | 10 $\mu$ M Midazolam | Species   | Time (min.) | 1 $\mu$ M R-VK4-116 | 10 $\mu$ M R-VK4-116 | 10 $\mu$ M Midazolam |
|-----------|-------------|---------------------|----------------------|----------------------|-----------|-------------|---------------------|----------------------|----------------------|
| Human     | 0           | 100.0               | 100.0                | 100.0                | Dog       | 0           | 100.0               | 100.0                | 100.0                |
|           | 30          | 41.1                | 69.7                 | 9.7                  |           | 30          | 44.6                | 74.3                 | 0.3                  |
|           | 60          | 25.9                | 60.1                 | 1.0                  |           | 60          | 22.5                | 64.5                 | 0.1                  |
|           | 90          | 22.3                | 55.5                 | 0.2                  |           | 90          | 22.3                | 55.6                 | 0.0                  |
|           | 120         | 16.4                | 48.9                 | 0.0                  |           | 120         | 19.7                | 49.9                 | 0.0                  |
| *HI-Human | 0           | 100.0               | 100.0                | 100.0                | HI-Dog    | 0           | 100.0               | 100.0                | 100.0                |
|           | 120         | 96.7                | 95.1                 | 101.3                |           | 120         | 90.7                | 90.6                 | 95.8                 |
| Rat       | 0           | 100.0               | 100.0                | 100.0                | Monkey    | 0           | 100.0               | 100.0                | 100.0                |
|           | 30          | 79.4                | 87.1                 | 5.8                  |           | 30          | 32.0                | 60.1                 | 0.1                  |
|           | 60          | 56.8                | 79.7                 | 0.4                  |           | 60          | 21.2                | 46.5                 | 0.0                  |
|           | 90          | 45.5                | 73.3                 | 0.1                  |           | 90          | 17.5                | 42.1                 | 0.0                  |
|           | 120         | 37.5                | 69.4                 | 0.0                  |           | 120         | 15.0                | 39.7                 | 0.0                  |
| HI-Rat    | 0           | 100.0               | 100.0                | 100.0                | HI-Monkey | 0           | 100.0               | 100.0                | 100.0                |
|           | 120         | 94.9                | 95.4                 | 102.2                |           | 120         | 90.0                | 89.9                 | 91.8                 |

\*HI: Heat Inactivated

<https://doi.org/10.1371/journal.pone.0315569.t003>

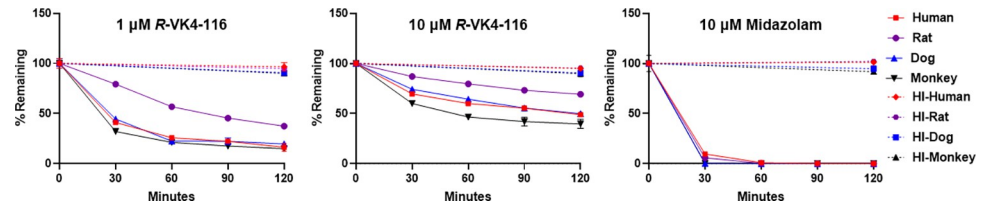

**Fig 2. Metabolic stability of R-VK4-116 and positive control, midazolam using human, rat, dog and monkey liver microsomes (% remaining Vs minutes; mean).**

<https://doi.org/10.1371/journal.pone.0315569.g002>

induction in CYP3A4 mRNA with an average 2.9-fold at 5  $\mu$ M. However, this induction was not concentration-dependent throughout hepatocyte lots. The positive control showed significant induction (26-fold) in CYP3A4 mRNA. (Table 6). In addition, R-VK4-116 (0.01 to 10  $\mu$ M) did not increase CYP3A4 activity (Table H in S1 File).

As per the Table I in S1 File, R-VK4-116 did not inhibit CYP significantly. Also, concentration dependent inhibition was not observed for any of the CYP450 isoforms screened when incubated with R-VK4-116 up to 100  $\mu$ M. The positive inhibitor control yielded significant inhibition of CYP enzyme activities consistent with expected values, demonstrating the integrity of the assays.

### Transporter mediated assay

At 1  $\mu$ M of R-VK4-116, less than a 2-fold difference in mean uptake rate was observed for each SLC transporter studied. Therefore, R-VK4-116 does not appear to be a substrate as defined by regulatory guidance documents [12] for human OAT1, OAT3, OCT2, OATP1B1, OATP1B3, MATE1, or MATE2-K under the study conditions (Fig 1 in S1 File). In addition, no statistically significant inhibition was seen for OAT1, OAT3, OCT2, OATP1B1, and OATP1B3 at

**Table 4. Metabolites of R-VK4-116 detected in 10  $\mu$ M samples incubated with human, rat, dog, and monkey liver microsomes.**

| Species | ID              | RT (min) | Mass Shift | Nominal Mass Change <sup>a</sup> (m/z) | Precursor Form               | Biotransformation                      | % Area |
|---------|-----------------|----------|------------|----------------------------------------|------------------------------|----------------------------------------|--------|
| Human   | M2              | 7.4      | 18         | 503.7 / 116.1                          | Demethylation + Di-Oxidation | [M-CH <sub>3</sub> +2O+H] <sup>*</sup> | 4.0    |
|         | M3              | 7.4      | 16         | 501.7 / 116.1                          | Oxidation                    | [M+O+H] <sup>*</sup>                   | 18.8   |
|         | M3 <sup>b</sup> | 7.4      | 16         | 501.7 / 144.1                          | Oxidation                    | [M+O+H] <sup>*</sup>                   | 1.7    |
|         | M4              | 7.7      | 16         | 501.7 / 132.1                          | Oxidation                    | [M+O+H] <sup>*</sup>                   | 5.6    |
|         | Parent          | 8.5      | 0          | 485.7 / 144.1                          | Parent                       | [M+H] <sup>*</sup>                     | 4.1    |
|         | Parent          | 8.5      | 0          | 485.7 / 116.1                          | Parent                       | [M+H] <sup>*</sup>                     | 62.4   |
| Rat     | M3              | 7.4      | 16         | 501.7 / 116.1                          | Oxidation                    | [M+O+H] <sup>*</sup>                   | 5.8    |
|         | Parent          | 8.6      | 0          | 485.7 / 144.1                          | Parent                       | [M+H] <sup>*</sup>                     | 86.1   |
|         | Parent          | 8.6      | 0          | 485.7 / 116.1                          | Parent                       | [M+H] <sup>*</sup>                     | 8.2    |
| Dog     | M1              | 6.9      | 32         | 517.7 / 116.1                          | Di-Oxidation                 | [M+2O+H] <sup>*</sup>                  | 4.1    |
|         | M2              | 7.4      | 18         | 503.7 / 116.1                          | Demethylation+ Di-Oxidation  | [M-CH <sub>3</sub> +2O+H] <sup>*</sup> | 44.5   |
|         | M3              | 7.4      | 16         | 501.7 / 116.1                          | Oxidation                    | [M+O+H] <sup>*</sup>                   | 6.4    |
|         | M4              | 7.8      | 16         | 501.7 / 132.1                          | Oxidation                    | [M+O+H] <sup>*</sup>                   | 6.1    |
|         | Parent          | 8.6      | 0          | 485.7 / 144.1                          | Parent                       | [M+H] <sup>*</sup>                     | 28.6   |
|         | Parent          | 8.6      | 0          | 485.7 / 116.1                          | Parent                       | [M+H] <sup>*</sup>                     | 10.4   |
| Monkey  | M1              | 6.9      | 32         | 517.7 / 116.1                          | Di-Oxidation                 | [M+2O+H] <sup>*</sup>                  | 100    |

<sup>a</sup>Samples analyzed in Multiple Reaction Monitoring (MRM) mode; Precursor Ion  $\rightarrow$  116, 132, 144 Product Ions.

<sup>b</sup>Same retention time as M2 and M3, same precursor ion (501.7) but different product ion (144.1).

<https://doi.org/10.1371/journal.pone.0315569.t004>

Table 5. Metabolism of *R*-VK4-116 by CYP2D6 and CYP3A4—varying substrate concentrations for  $K_m$  and  $V_{max}$  determination.

| <i>R</i> -VK4-116<br>( $\mu$ M) | M1 (Major hydroxylated) |                     | M2 (Minor hydroxylated) |                      | M3 (Minor unidentified) |                      |
|---------------------------------|-------------------------|---------------------|-------------------------|----------------------|-------------------------|----------------------|
|                                 | Peak Area Ratio         |                     | Peak Area Ratio         |                      | Peak Area Ratio         |                      |
|                                 | CYP2D6                  | CYP3A4              | CYP2D6                  | CYP3A4               | CYP2D6                  | CYP3A4               |
|                                 | Mean $\pm$ SD           | Mean $\pm$ SD       | Mean $\pm$ SD           | Mean $\pm$ SD        | Mean                    | Mean $\pm$ SD        |
| 0                               | 0.000 $\pm$ 0.000       | 0.000 $\pm$ 0.000   | 0.000 $\pm$ 0.000       | 0.000 $\pm$ 0.000    | 0.000 $\pm$ 0.000       | 0.000 $\pm$ 0.000    |
| 0.025                           | 0.0456 $\pm$ 0.0075     | 0.0143 $\pm$ 0.0005 | 0.0181 $\pm$ 0.0019     | 0.00406 $\pm$ 0.0002 | 0.00975 $\pm$ 0.0011    | 0.00229 $\pm$ 0.0001 |
| 0.05                            | 0.102 $\pm$ 0.0122      | 0.0303 $\pm$ 0.0011 | 0.0414 $\pm$ 0.0018     | 0.00833 $\pm$ 0.0001 | 0.0222 $\pm$ 0.0014     | 0.00443 $\pm$ 0.0002 |
| 0.1                             | 0.187 $\pm$ 0.0211      | 0.0714 $\pm$ 0.0099 | 0.0740 $\pm$ 0.0048     | 0.0167 $\pm$ 0.0015  | 0.0401 $\pm$ 0.0034     | 0.0101 $\pm$ 0.0007  |
| 0.15                            | 0.259 $\pm$ 0.0072      | 0.0904 $\pm$ 0.0007 | 0.103 $\pm$ 0.0064      | 0.0214 $\pm$ 0.0009  | 0.0544 $\pm$ 0.0031     | 0.0117 $\pm$ 0.0003  |
| 0.2                             | 0.352 $\pm$ 0.0029      | 0.130 $\pm$ 0.0051  | 0.115 $\pm$ 0.0029      | 0.0207 $\pm$ 0.0001  | 0.0622 $\pm$ 0.0028     | 0.0124 $\pm$ 0.0007  |
| 0.25                            | 0.333 $\pm$ 0.0060      | 0.155 $\pm$ 0.0047  | 0.111 $\pm$ 0.0050      | 0.0187 $\pm$ 0.0006  | 0.0605 $\pm$ 0.0047     | 0.0119 $\pm$ 0.0002  |
| 0.375                           | 0.369 $\pm$ 0.0234      | 0.166 $\pm$ 0.0068  | 0.128 $\pm$ 0.0147      | 0.0198 $\pm$ 0.0008  | 0.0677 $\pm$ 0.0078     | 0.0131 $\pm$ 0.0005  |
| 0.5                             | 0.407 $\pm$ 0.0117      | 0.186 $\pm$ 0.0067  | 0.135 $\pm$ 0.0046      | 0.0203 $\pm$ 0.0017  | 0.0714 $\pm$ 0.0021     | 0.0137 $\pm$ 0.0012  |
| 0.75                            | 0.503 $\pm$ 0.0447      | 0.197 $\pm$ 0.0293  | 0.155 $\pm$ 0.0026      | 0.0256 $\pm$ 0.0062  | 0.0827 $\pm$ 0.0015     | 0.0145 $\pm$ 0.0014  |
| 1                               | 0.479 $\pm$ 0.0197      | 0.217 $\pm$ 0.0091  | 0.149 $\pm$ 0.0096      | 0.0285 $\pm$ 0.0011  | 0.0793 $\pm$ 0.0067     | 0.0173 $\pm$ 0.0007  |

<https://doi.org/10.1371/journal.pone.0315569.t005>

10  $\mu$ M *R*-VK4-116. However, slight but significant inhibition ( $p < 0.05$ ) was seen for MATE1 (19.4%  $\pm$  7.57%), and MATE2-K (37.8%  $\pm$  9.26%) (Table 7).

In addition, results for the transcellular passage of *R*-VK4-116 were below the limit of quantitation in both the basolateral to apical (B  $\rightarrow$  A) and in the apical to basolateral (A  $\rightarrow$  B) directions for both ABC transporters (BCRP and P-gp) at 1  $\mu$ M (Table J in S1 File). However, a significant inhibition was seen for BCRP (54.0%  $\pm$  1.46%) and P-gp (56.5%  $\pm$  6.17%) at 10  $\mu$ M (Table 8). All probe substrates showed sufficient transport, and all reference inhibitors showed sufficient inhibition to meet the assay acceptance criteria.

### Lysosomal perturbation

The results from the lysosomal trapping assay were demonstrated in Fig 2 in S1 File. No significant increase in red lysosomal stain signal or decrease in blue nuclear stain signal over respective solvent control was observed for *R*-VK4-116 (Fig 2C in S1 File). The assay negative control piroxicam result was as expected (Fig 2B in S1 File). In contrast, a 2-3-fold increase in

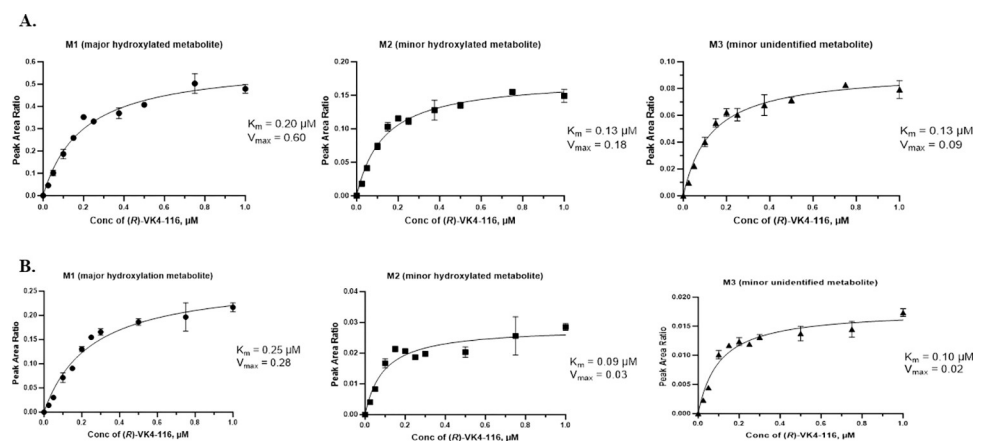

Fig 3. Kinetic plots for the formation of metabolites of VK4-116 by CYP2D6 (Fig 3A) and CYP3A4 (Fig 3B). M1, the major hydroxylated metabolite; M2, the minor hydroxylated metabolite; and M3, the minor unidentified metabolite.

<https://doi.org/10.1371/journal.pone.0315569.g003>

Table 6. Effect of *R*-VK4-116 on CYP3A4 mRNA expression in human hepatocytes.

| Hepatocyte Lot No. | Treatment         | Concentration (μM) | Fold Induction <sup>a</sup> |
|--------------------|-------------------|--------------------|-----------------------------|
| Lot 336            | 0.1% DMSO         | 0                  | 1.0 ± 0.076                 |
|                    | <i>R</i> -VK4-116 | 0.01               | 1.1 ± 0.079                 |
|                    | <i>R</i> -VK4-116 | 0.1                | 1.1 ± 0.18                  |
|                    | <i>R</i> -VK4-116 | 1                  | 2.3 ± 0.15                  |
|                    | <i>R</i> -VK4-116 | 3                  | 3.7 ± 0.56                  |
|                    | <i>R</i> -VK4-116 | 5                  | 4.0 ± 0.78                  |
|                    | <i>R</i> -VK4-116 | 10                 | 3.7 ± 0.20                  |
|                    | 0.1% DMSO         | 0                  | 1.0 ± 0.19                  |
|                    | Rifampicin        | 10                 | 37 ± 7.8                    |
| Lot 348B           | 0.1% DMSO         | 0                  | 1.0 ± 0.17                  |
|                    | <i>R</i> -VK4-116 | 0.01               | 1.1 ± 0.050                 |
|                    | <i>R</i> -VK4-116 | 0.1                | 1.2 ± 0.081                 |
|                    | <i>R</i> -VK4-116 | 1                  | 1.3 ± 0.12                  |
|                    | <i>R</i> -VK4-116 | 3                  | 1.8 ± 0.17                  |
|                    | <i>R</i> -VK4-116 | 5                  | 2.0 ± 0.27                  |
|                    | <i>R</i> -VK4-116 | 10                 | 1.9 ± 0.13                  |
|                    | 0.1% DMSO         | 0                  | 1.0 ± 0.084                 |
|                    | Rifampicin        | 10                 | 20 ± 3.0                    |
| Lot 399            | 0.1% DMSO         | 0                  | 1.0 ± 0.025                 |
|                    | <i>R</i> -VK4-116 | 0.01               | 1.2 ± 0.20                  |
|                    | <i>R</i> -VK4-116 | 0.1                | 1.2 ± 0.11                  |
|                    | <i>R</i> -VK4-116 | 1                  | 1.8 ± 0.12                  |
|                    | <i>R</i> -VK4-116 | 3                  | 2.6 ± 0.14                  |
|                    | <i>R</i> -VK4-116 | 5                  | 2.7 ± 0.40                  |
|                    | <i>R</i> -VK4-116 | 10                 | 2.3 ± 0.39                  |
|                    | 0.1% DMSO         | 0                  | 1.0 ± 0.14                  |
|                    | Rifampicin        | 10                 | 21 ± 3.6                    |

Data are the mean ± SD from 3 wells.

<sup>a</sup> Fold of vehicle control—the mean fold change of treated samples compared to vehicle control samples.

<https://doi.org/10.1371/journal.pone.0315569.t006>

red lysosomal signal with no significant decrease of the blue nuclear signal was observed in HepG2 cells following 72-hr treatment with the two highest concentrations of the positive control verapamil (Fig 2A in S1 File). These results suggested that there was no significant lysosomal perturbation in HepG2 cells following 72-hr incubations of *R*-VK4-116 (0.1, 1.0, and 10.0 μM) over control.

### MT assay

The results from the cytotoxicity (MTT assay) are summarized in Fig 4A. Approximately 40–50% decrease in HepG2 cell viability compared with the solvent control was observed following 72-hr treatment with the *R*-VK4-116 (10 to 100 μM).

Based on the cell viability data, the three concentrations 0.1, 1 and 10 μM of *R*-VK4-116 were selected for the subsequent 2-week MT assay. Fig 4B–4G summarized the results of the MT assay panel following 7- and 14-day treatment of HepG2 cells with *R*-VK4-116. No significant decrease in OXPHOS complex 1, 3, 4, and 5 or in total ATP levels was observed for any tested concentrations of *R*-VK4-116 (Fig 4B–4D). Furthermore, no significant increase in

Table 7. The inhibition of OAT1, OAT3, OCT2, OATP1B1, OATP1B3, MATE1 and MATE-2K mediated transport by R-VK4-116.

| Transporter | Condition | Test Conditions   | Accumulation of probe substrate (pmol/min/cm <sup>2</sup> ) |                    |                   | Inhibition (%) | p value |
|-------------|-----------|-------------------|-------------------------------------------------------------|--------------------|-------------------|----------------|---------|
|             |           |                   | transporter cells                                           | control cells      | Net               |                |         |
| OAT1        | No BSA    | 0.5% DMSO         | 1.64 ± 0.276                                                | 0.0855 ± 0.0113    | 1.56 ± 0.276      |                |         |
|             |           | 100 μM probenecid | 0.198 ± 0.024                                               | 0.0790 ± 0.00983   | 0.119 ± 0.0240    | 92.4 ± 1.54    |         |
|             | 0.1% BSA  | 0.5% DMSO         | 2.09 ± 0.178                                                | 0.0741 ± 0.00739   | 2.02 ± 0.178      |                |         |
|             |           | 10 μM R-VK4-116   | 1.90 ± 0.0319                                               | 0.0645 ± 0.00739   | 1.84 ± 0.0319     | 8.97 ± 1.58    | >0.05   |
| OAT3        | No BSA    | 0.5% DMSO         | 0.105 ± 0.00225                                             | 0.0116 ± 0.000391  | 0.0939 ± 0.00225  |                |         |
|             |           | 100 μM probenecid | 0.0159 ± 0.00068                                            | 0.0116 ± 0.00130   | 0.00438 ± 0.00068 | 95.3 ± 0.73    |         |
|             | 0.1% BSA  | 0.5% DMSO         | 0.0483 ± 0.00484                                            | 0.00554 ± 0.000226 | 0.0428 ± 0.00484  |                |         |
|             |           | 10 μM R-VK4-116   | 0.0503 ± 0.00345                                            | 0.00500 ± 0.00150  | 0.0452 ± 0.00345  | -5.73 ± 8.06   | >0.05   |
| OCT2        | No BSA    | 0.5% DMSO         | 7.91 ± 0.660                                                | 0.576 ± 0.0332     | 7.34 ± 0.660      |                |         |
|             |           | 1000 μM quinidine | 0.345 ± 0.0153                                              | 0.370 ± 0.0174     | -0.0254 ± 0.0153  | 100 ± 0.21     |         |
|             | 0.1% BSA  | 0.5% DMSO         | 8.13 ± 0.627                                                | 0.531 ± 0.0436     | 7.6 ± 0.627       |                |         |
|             |           | 10 μM R-VK4-116   | 9.49 ± 0.143                                                | 0.566 ± 0.0544     | 8.93 ± 0.143      | -17.4 ± 1.88   | 0.0234  |
| OATP1B1     | No BSA    | 0.5% DMSO         | 0.822 ± 0.101                                               | 0.0840 ± 0.00      | 0.738 ± 0.101     |                |         |
|             |           | 100 μM rifampicin | 0.0687 ± 0.0101                                             | 0.0561 ± 0.0102    | 0.0126 ± 0.0101   | 98.3 ± 1.37    |         |
|             | 0.1% BSA  | 0.5% DMSO         | 0.672 ± 0.0148                                              | 0.0413 ± 0.00284   | 0.630 ± 0.0148    |                |         |
|             |           | 10 μM R-VK4-116   | 0.634 ± 0.109                                               | 0.0387 ± 0.00839   | 0.596 ± 0.109     | 5.50 ± 17.3    | >0.05   |
| OATP1B3     | No BSA    | 0.5% DMSO         | 2.34 ± 0.136                                                | 0.0234 ± 0.00936   | 2.31 ± 0.136      |                |         |
|             |           | 100 μM rifampicin | 0.0411 ± 0.00597                                            | 0.0234 ± 0.00519   | 0.0176 ± 0.00597  | 99.2 ± 0.26    |         |
|             | 0.1% BSA  | 0.5% DMSO         | 2.50 ± 0.181                                                | 0.00588 ± 0.00     | 2.49 ± 0.181      |                |         |
|             |           | 10 μM R-VK4-116   | 2.40 ± 0.266                                                | 0.0350 ± 0.0116    | 2.36 ± 0.266      | 5.29 ± 10.7    | >0.05   |
| MATE1       | No BSA    | 0.5% DMSO         | 23.2 ± 1.07                                                 | 0.463 ± 0.0174     | 22.7 ± 1.07       |                |         |
|             |           | 100 μM cimetidine | 0.597 ± 0.0495                                              | 0.434 ± 0.0163     | 0.163 ± 0.0495    | 99.3 ± 0.22    |         |
|             | 0.1% BSA  | 0.5% DMSO         | 24.2 ± 1.25                                                 | 0.431 ± 0.0725     | 23.7 ± 1.25       |                |         |
|             |           | 10 μM R-VK4-116   | 19.4 ± 1.80                                                 | 0.290 ± 0.0259     | 19.1 ± 1.80       | 19.4 ± 7.57    | 0.0219  |
| MATE2-K     | No BSA    | 0.5% DMSO         | 5.48 ± 0.226                                                | 0.435 ± 0.0314     | 5.04 ± 0.226      |                |         |
|             |           | 100 μM cimetidine | 0.738 ± 0.0296                                              | 0.531 ± 0.0866     | 0.208 ± 0.0296    | 95.9 ± 0.59    |         |
|             | 0.1% BSA  | 0.5% DMSO         | 5.93 ± 0.859                                                | 0.360 ± 0.0457     | 5.57 ± 0.859      |                |         |
|             |           | 10 μM R-VK4-116   | 3.76 ± 0.516                                                | 0.294 ± 0.0329     | 3.47 ± 0.516      | 37.8 ± 9.26    | 0.0221  |

<https://doi.org/10.1371/journal.pone.0315569.t007>

caspace 3, or total glutathione levels was observed for any tested concentrations of R-VK4-116. However, a 10–35% increase in ROS/RNS levels compared with the solvent control was observed for HepG2 cells treated for 7-days with all three concentrations of R-VK4-116 (Fig 4E-4G). The positive control, zalcitabine results are briefly described in Fig 3 in the [S1 File](#).

Table 8. The inhibition of BCRP and P-gp mediated transport by R-VK4-116.

| Transporter | Test Conditions | P <sub>app</sub> B->A (x10 <sup>-6</sup> cm/s) | P <sub>app</sub> A->B (x10 <sup>-6</sup> cm/s) | Mean Net B->A flux (pmol/min/cm <sup>2</sup> ) | Efflux ratio (P <sub>app</sub> B->A)/(P <sub>app</sub> A->B) | Inhibition (%) | P value |
|-------------|-----------------|------------------------------------------------|------------------------------------------------|------------------------------------------------|--------------------------------------------------------------|----------------|---------|
| BCRP        | 0.5% DMSO       | 53.4 ± 2.06                                    | 3.91 ± NA                                      | 6.95 ± 0.29                                    | 13.7 ± 0.53                                                  | -              | -       |
|             | 10 μM R-VK4-116 | 50.5 ± 1.36                                    | 7.40 ± 2.12                                    | 6.05 ± 0.19                                    | 6.82 ± 0.18                                                  | 54.0 ± 1.46    | <0.0001 |
|             | 1 μM Ko143      | 21.2 ± 0.51                                    | 17.8 ± 0.83                                    | 0.48 ± 0.07                                    | 1.19 ± 0.03                                                  | 98.5 ± 0.22    | -       |
| P-gp        | 0.5% DMSO       | 72.2 ± 16.2                                    | 1.10 ± 0.22                                    | 0.44 ± 0.1                                     | 65.6 ± 14.7                                                  | -              | -       |
|             | 10 μM R-VK4-116 | 74.7 ± 10.2                                    | 2.57 ± 0.62                                    | 0.44 ± 0.06                                    | 29.1 ± 3.99                                                  | 56.5 ± 6.17    | 0.0144  |
|             | 3 μM elacridar  | 19.9 ± 3.38                                    | 9.87 ± 1.03                                    | 0.06 ± 0.02                                    | 2.01 ± 0.34                                                  | 98.4 ± 0.53    | -       |

The probe substrates were 2 μM prazosin for BCRP, and 0.1 μM quinidine for P-gp.

NA: One of the triplicates was removed by Grubbs test; standard deviation is not reported for this value.

Data represented the mean and standard deviation of triplicate samples.

<https://doi.org/10.1371/journal.pone.0315569.t008>

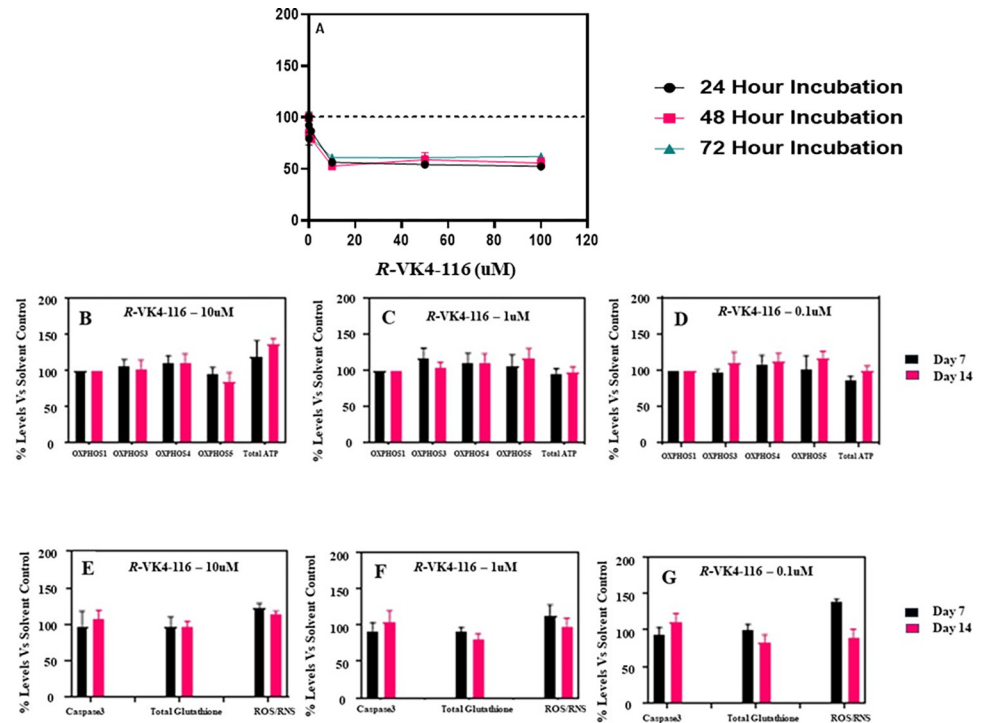

**Fig 4.** HepG2 cell viability (A), and MT with 10 μM (B, E), 1 μM (C, F) and 0.1 μM (D, G) of R-VK4-116.

<https://doi.org/10.1371/journal.pone.0315569.g004>

### Off-target enzyme effects, receptor functional assays, electrophysiological assays and CiPA

An inhibition or stimulation higher than 50% was considered a significant effect, while results showing inhibition or stimulation between 25 and 50% were indicative of weak to moderate effects of the test compound. R-VK4-116 (10 μM) did not show any enzyme inhibition effects or uptake (Fig 4 in S1 File). In addition, R-VK4-116 did not exhibit agonist and antagonist effects for most of the targets (Figs 5 and 6 in S1 File). However, a significant inhibition (antagonist) effect of R-VK4-116 (10 μM) was observed for  $\alpha 1A(h)$  at 82.9% and H1(h) at 86.1%, while a weak to moderate antagonist effects were observed for 5-HT2B(h) at 44.6% and V1a(h) at 27.8%. Furthermore, R-VK4-116 showed an agonist effect of 97.71% for hGABAA $\infty$ 1 $\beta$ 2 $\gamma$ 2 at 10 μM in the IonFlux HT.

In the CiPA assay, R-VK4-116 did not show any effect on the ion channels except hERG and Kir2.1. The hERG at 10 μM (54.60%) and 100 μM (82.26%), and Kir2.1 at 100 μM (Peak, 52.64% and End, 97.19%) showed an inhibition greater than 50% (Table K in S1 File).

### KINOME<sup>TM</sup> profiling

S-score with %Control <35 results showed for the genes: Checkpoint kinase 2 (CHEK2), Hematopoietic progenitor kinase 1 (HPK1), Microtubule affinity-regulating kinase 3 (MARK3), Serine/threonine-protein kinase SRPK2 (SRPK2), and Tyrosine Kinase Non-Receptor 1 (TNK1). A follow-up KINOMEScan<sup>TM</sup> was performed with R-VK4-116 at an 11-point concentration-response curve ranging from 0.001 to 10 μM. These concentrations were tested at 5 hits that had a selectivity score of S (35) in the primary screen. R-VK4-116 interacted with CHEK2, HPK1, MARK3, SRPK2 and TNK1 (5 hits) at 1 μM. In all 5 hits, the binding constants (K<sub>d</sub>s) were >10 μM (Table L in S1 File).

Table 9. Determination of 0.5 and 1 μM R-VK4-116 binding to human, rat and dog plasma proteins by gel filtration.

| Species | Nominal Conc. (μM) <sup>a</sup> | [R-VK4-116] Before Filtration (μM) | [R-VK4-116] In Sephadex G-25 Eluate (μM) | Ratio [R-VK4-116] Before Filtration / Eluate | Mean ± SD    | % Bound <sup>c</sup> | Mean ± SD |
|---------|---------------------------------|------------------------------------|------------------------------------------|----------------------------------------------|--------------|----------------------|-----------|
| Human   | 0.5                             | 0.550                              | 0.520                                    | 1.06                                         | 0.988 ± 0.13 | 97.4                 | 97.2± NC  |
|         |                                 | 0.597                              | 0.715                                    | 0.835 <sup>b</sup>                           |              | NC <sup>b</sup>      |           |
|         |                                 | 0.598                              | 0.557                                    | 1.07                                         |              | 96.9                 |           |
| Rat     | 0.5                             | 0.631                              | 0.533                                    | 1.18                                         | 1.19 ± 0.01  | 83.6                 | 83.2±3.72 |
|         |                                 | 0.631                              | 0.535                                    | 1.18                                         |              | 79.3                 |           |
|         |                                 | 0.630                              | 0.525                                    | 1.20                                         |              | 86.7                 |           |
| Dog     | 0.5                             | 0.609                              | 0.491                                    | 1.24                                         | 1.25 ± 0.01  | 77.9                 | 83.6±7.50 |
|         |                                 | 0.618                              | 0.495                                    | 1.25                                         |              | 92.1                 |           |
|         |                                 | 0.616                              | 0.493                                    | 1.25                                         |              | 80.8                 |           |
| Human   | 1                               | 0.923                              | 0.614                                    | 1.50                                         | 1.56 ± 0.06  | 92.5                 | 85.9± NC  |
|         |                                 | 0.995                              | 0.615                                    | 1.62                                         |              | 81.6                 |           |
|         |                                 | 1.02                               | 0.657                                    | 1.55                                         |              | 83.7                 |           |
| Rat     | 1                               | 1.03                               | 0.632                                    | 1.63                                         | 1.60 ± 0.02  | 91.4 <sup>d</sup>    | 92.8±1.29 |
|         |                                 | 1.01                               | 0.632                                    | 1.60                                         |              | 93.9                 |           |
|         |                                 | 1.02                               | 0.647                                    | 1.58                                         |              | 93.2                 |           |
| Dog     | 1                               | 1.05                               | 0.626                                    | 1.68                                         | 1.65 ± 0.13  | 73.3                 | 82.7±9.60 |
|         |                                 | 1.07                               | 0.707                                    | 1.51                                         |              | 92.5                 |           |
|         |                                 | 1.07                               | 0.604                                    | 1.77                                         |              | 82.4                 |           |

<sup>a</sup> Lower Limit of Quantitation (LLOQ) was 0.01 μM

<sup>b</sup> Grubb's test rejects outlier data, Not calculated

$$\text{c } \% \text{Bound} = \left( \frac{[\text{Protein}]_{\text{before}}}{[\text{Protein}]_{\text{elute}}} \right) \times \left( \frac{[\text{Drug}]_{\text{elute}}}{[\text{Drug}]_{\text{before}}} \right) \times 100$$

<sup>d</sup> % bound calculated using mean protein ratio since individual value could not be calculated

<https://doi.org/10.1371/journal.pone.0315569.t009>

## Plasma protein binding assay

Table 9 shows the results of the gel filtration protein binding experiment of R-VK4-116 in plasma. In human plasma, the mean percentage of R-VK4-116 bound to proteins was 97.2 and 85.9%, at 0.5 and 1 μM, respectively. In rat plasma, 83.2 and 92.8% of R-VK4-116 were bound to proteins when tested at 0.5 and 1 μM, respectively. Further, 83.6 and 82.7% of R-VK4-116 was bound to dog plasma proteins when tested at 0.5 and 1 μM, respectively.

## Phospholipidosis and steatosis

Based on the results (Table 10), R-VK4-116 caused phospholipidosis (MEC of 0.0317 μM; AC<sub>50</sub> of 10.7 μM). A steatosis response was also reported (MEC of 14.2 μM; AC<sub>50</sub> of >100 μM); however, it was not considered significant since the response was just slightly above the significant cut-off from the vehicle control, and no dose response was observed for steatosis with increasing concentrations. No response was observed for cell count, nuclear size or DNA structure. For positive control sertraline, the lowest MEC and AC<sub>50</sub> response indicated an increase in phospholipidosis. In the case of positive control tamoxifen, the lowest MEC and AC<sub>50</sub> response indicated an increase in steatosis.

## Discussion

D<sub>3</sub>R partial agonists and antagonists are being developed for the treatment of SUD (substance use disorder), including OUD. In one study, an acute dose (0.5 mg) of a D<sub>3</sub> agonist did not

Table 10. Cell health parameters for R-VK4-116, sertraline and tamoxifen.

| Parameter        | R-VK4-116  |           |                       | Sertraline |            |                       | Tamoxifen  |          |                       |
|------------------|------------|-----------|-----------------------|------------|------------|-----------------------|------------|----------|-----------------------|
|                  | Trend (↑↓) | MEC (μM)  | AC <sub>50</sub> (μM) | Trend (↑↓) | MEC (μM)   | AC <sub>50</sub> (μM) | Trend (↑↓) | MEC (μM) | AC <sub>50</sub> (μM) |
| Cell count       |            | NR        | NR                    | ↓          | 1.61       | 2.48                  | ↑          | 0.360    | 0.442                 |
| Nuclear size     |            | NR        | NR                    |            | NR         | NR                    | ↓          | 0.672    | 3.05                  |
| DNA structure    |            | NR        | NR                    | ↑          | 0.876      | 6.23                  | ↑          | 2.57     | 6.30                  |
| Phospholipidosis | ↑          | 0.0317    | 10.7                  | ↑          | <0.0977    | 0.351                 | ↑          | 0.447    | 0.764                 |
| Steatosis        | ↑          | 14.2 (NS) | >100# (NS)            | ↑          | 0.822 (NS) | >3.13# (NS)           | ↑          | 4.38     | 16.9                  |

MEC: Minimum effective concentration that significantly crosses vehicle control threshold.

AC<sub>50</sub>: The concentration at which 50% maximum effect is observed for each cell health parameter.

#An AC<sub>50</sub> was calculated but is greater than the maximum surviving concentration.

NS: Not statistically significant.

↑ increasing trend of response; ↓ decreasing trend of response

NR: No response observed.

<https://doi.org/10.1371/journal.pone.0315569.t010>

reduce motivation for smoking cigarettes, while a 3 mg dose intensified cocaine effects in humans [26, 27]. Thus, the use of a D<sub>3</sub>R agonist for the treatment of nicotine dependence and cocaine use disorder is questionable. Acute and chronic treatments with the D<sub>3</sub>R antagonist (PG01037) but not the agonist (PF-592,379) in rats showed decreases in cocaine induced behaviors [28]. However, clinical translation of D<sub>3</sub> antagonists has been challenging due to lack of favorable ADMET (Absorption, Distribution, Metabolism, Excretion and Toxicity) properties [3, 4]. VK4-116 (a new highly selective D<sub>3</sub>R antagonist) was designed to improve upon these challenges [5]. In addition, the enantioselective synthesis of R- and S-VK4-116 was achieved, and the R-enantiomer was determined to be the eutomer at D<sub>3</sub>R [8]. R-VK4-116 was effective in decreasing oxycodone self-administration, suppressing reinstatement to oxycodone-stimulated drug seeking, and, reducing withdrawal-associated hyperalgesia [6, 7]. In the past, the D<sub>3</sub>R-selective antagonist, GSK598,809 showed promising preclinical data for treatment of nicotine dependence and cocaine use disorder but further development of this agent was halted due to the development of hypertension in dogs in combination with cocaine [4, 9]. In addition, another D<sub>3</sub>R antagonist (SB-277,011A) also showed adverse cardiovascular effects in the presence of cocaine in dogs [29]. However, R-VK4-116 did not increase the cardiovascular effects of either cocaine or oxycodone in rats [9].

Methadone, buprenorphine, and naltrexone are all FDA-approved drugs for the treatment of OUD. However, novel and safe therapeutics would be a welcome addition to the medication toolbox, especially effective medications that are non-opioid. In this exploratory study, the highly D<sub>3</sub>R-selective antagonist, R-VK4-116, was evaluated *in vitro* to predict its safety *in vivo*, and to assess the relative sensitivity of different species to this compound. These studies were also important to choosing an appropriate animal species in which to conduct *in vivo* toxicology experiments (<https://www.fda.gov/media/72028/download>).

Drug metabolism mainly occurs in the liver [12]. So, metabolic stability was evaluated in the *in vitro* hepatocytes or liver microsomes. It is crucial to determine whether significant species differences are observed in drug metabolism [30]. This is also helpful to select animal species (one rodent and one non-rodent) with similar physiology that can produce similar metabolic stability and metabolites to humans for assigning the 'relevant animal species' for non-clinical safety evaluations [31, 32]. Rats and dogs are commonly used species for standard toxicity studies [32]. We evaluated *in vitro* metabolism of R-VK4-116 in human, rat and dog



hepatocytes to predict *in vivo* metabolic intrinsic clearance [33]. *R*-VK4-116 was metabolically stable in the hepatocytes of each tested species (Table 1). The observed *in vitro*  $t_{1/2}$  and  $CL_{int}$  in rat, human and dog hepatocytes showed similar stability of *R*-VK4-116 (Table 2). In the metabolic stability study of *R*-VK4-116 using liver microsomes, the metabolism was similar in human, monkey, rat and dog (Table 3). Also, metabolites of *R*-VK4-116 observed in human were present in dog (M2, M3 and M4) and rat (M3) but not in monkey (M1). It is important to assess human-relevant metabolites adequately. Since rat and dog were showing similar metabolic stability and metabolite profile to human these animals can be used as appropriate species, while monkey may not be the appropriate species to conduct safety evaluations due to the difference in metabolite profile.

Since patients being treated with *R*-VK4-116 are likely to be prescribed other medications, it is essential to assess whether *R*-VK4-116 is a substrate, inducer or inhibitor in metabolism/transporter-mediated drug interactions. Several CYP enzymes involved in drug metabolism contribute to variable drug exposure levels [34, 35]. As per USFDA, CYP1A2, CYP2B6, CYP2C8, CYP2C9, CYP2C19, CYP2D6, and CYP3A4 should be used for *in vitro* phenotyping to determine enzymes involved in the metabolism of the investigational drug. If the investigational drug did not undergo significant metabolism by these major enzymes, additional enzymes can be evaluated for *in vitro* phenotyping [12]. In the phenotyping screen, CYP2D6 or CYP3A4 showed the greatest decrease in *R*-VK4-116 over time, which indicated a major contribution of these enzymes in metabolism (Table 5). In addition, CYPs induction and inhibition were major causes of clinical drug–drug interactions [36]. As per USFDA, *R*-VK4-116 was evaluated to assess its potential to induce (CYP1A2, CYP2B6 and CYP3A4) and inhibit (CYP1A2, CYP2B6, CYP2C8, CYP2C9, CYP2C19, CYP2D6, and CYP3A) enzymes [12]. *R*-VK4-116 caused a slight induction (2.9-fold) in CYP3A4 mRNA at a higher concentration (5  $\mu$ M) as compared with the positive control, Rifampicin (26-fold induction). Also, this induction was neither concentration-dependent nor consistent in different lots of hepatocytes (Table 6). Further, *R*-VK4-116 did not cause induction in any CYP activity. Considering these results, *R*-VK4-116 was not evaluated further to assess its induction effect on other enzymes. In addition, the concentration dependent inhibition of *R*-VK4-116 was not observed for any of the CYP isoforms (Table I in S1 File). In clinical use, OAT1, OAT3, OCT2, OATP1B1, OATP1B3, MATE1, MATE-2K, P-gp and BCRP interact with drugs [12]. All uptake transporters (OAT1, OAT3, OCT2, OATP1B1 and OATP1B3) and two export transporters (MATE1 and MATE-2K) belong to the SLC transporters [37]. Most efflux transporters, including P-gp and BCRP, are part of the ABC transporter family [38]. Since these transporters can regulate the drug's disposition and pharmacological action, the evaluation of *R*-VK4-116 is important as a substrate and/or inhibitor of these transporters [12]. Based on the result, *R*-VK4-116 was not a substrate for any transporters (Fig 1 and Table J in S1 File). Although, significant inhibition (>50%) was seen for BCRP and P-gp (Table 8), the concentration of *R*-VK4-116 was 10  $\mu$ M, which is too high to be clinically relevant to cause the transporter-mediated drug interactions. P-gp or BCRP inhibition elevates the P-gp or BCRP substrate drug's plasma concentration, respectively, which could lead to increased toxicity of the substrate [39–41]. Collectively, these results suggested that *R*-VK4-116 has a very low potential to cause metabolism/transporter-mediated drug interactions.

The protein binding ability may impact drug toxicity. Interspecies differences in plasma protein binding may lead to decreased or increased drug-safety margin [42]. In this assay, *R*-VK4-116 was bound to plasma in all tested species (~83–93%) (Table 9). This limits the partitioning of drug from blood to tissue, which reduces the burden of tissue/organ-specific toxicities. A drug's cytotoxic effects are often first seen as lysosome perturbation, which is a result of ion trapping of amine-containing compounds to form autophagosomes and autophagic

cytopathology [43]. The result in Fig 2C in S1 File suggested that R-VK4-116 did not show any cytotoxic effects. Since phospholipidosis and steatosis were considered adverse findings, it is important to identify lipid metabolic disorders induced by drugs in the early development stage [44] with *in vitro* cell-based assays: liver phospholipidosis and steatosis. The results demonstrated that R-VK4-116 did not induce significant phospholipidosis or steatosis ( $\leq 10 \mu\text{M}$ ) (Table 10). Further, mitochondria are important in the production of cellular energy, fatty acid metabolism, calcium signaling, steroid synthesis, heme production, apoptosis and autophagy [45, 46]. Hence, drug-instigated mitochondrial dysfunction is implicated in organ toxicity. This can lead to drug withdrawal or black box warnings [47]. As per OXPHOS enzyme assays (energy metabolism disruption), ROS/RNS production (free radical production), total glutathione expression and caspase 3 activation (altered apoptosis) results (Fig 4B-4G), R-VK4-116 did not induce mitochondrial toxicity. Collectively, these results demonstrate the promising *in vitro* safety profile of R-VK4-116.

In human physiology, kinases are important for phosphorylation [48]. Kinases have major significance in metabolism, cell signaling, protein regulation, cellular transport and secretory processes [49, 50]. R-VK4-116 showed only 5 hits (CHEK2, HPK1, MARK3, SRPK2 and TNK1). CHEK2 plays role in the pathway of DNA damage repair [51] while HPK1 plays a role in stress responses, apoptosis and proliferation in hematopoietic cells [52]. MARK3 regulates cell cycle and cell differentiation [53]. SRPK2 contributes interaction and localization of pre-mRNA splicing factors in cells [54], while TNK1 plays a role in lymphoid cell proliferation [55]. However, the binding constants (K<sub>d</sub>s) for these 5 hits were  $> 10 \mu\text{M}$  of R-VK4-116, which suggests the low potential to cause off-target kinase activity. Also, multiple assays were being used to examine the modulation of cellular and nuclear receptor functions [56]. In these assays, R-VK4-116 (10  $\mu\text{M}$ ) did not show any effects on the tested targets except the antagonist effect on  $\alpha 1A(h)$  and H1(h), and the agonist effect on hGABAA $\infty 1\beta 2\gamma 2$ .  $\alpha 1A(h)$  inhibition leads to a reduction in smooth muscle contraction [57], while H1(h) inhibition can cause somnolence or adverse effects on CNS [58]. Also, hGABAA activation may mediate sedative effects [59]. Since R-VK4-116 concentration was 10  $\mu\text{M}$  in these assays, this concentration is too high to be clinically relevant to cause the off-target effects. CiPA helps to understand torsadogenic mechanisms beyond hERG blockade to evaluate proarrhythmic risk [60]. R-VK4-116 did not affect ion channels except hERG and Kir2.1. hERG controlled the QT interval, while Kir2.1 regulated the resting membrane potential and modulated excitability [61, 62]. Although R-VK4-116 inhibited the hERG channel, the inhibition was moderate to high (~54–82% at  $\geq 10 \mu\text{M}$ ). Also, R-VK4-116 inhibited the Kir2.1 channel at 100  $\mu\text{M}$ . The concentration of R-VK4-116 was too high to be clinically relevant in the above assays. In addition, this compound did not potentiate the cardiovascular effects alone and in combination with either cocaine or oxycodone in rats [9]. Overall, these *in vitro* results indicated that R-VK4-116 has low potential to cause any impact on off-target kinase activity, off-target effects or changes in ion channel activities.

R-VK4-116 showed an antagonist effect on D<sub>3</sub>R at 350 nM (IC<sub>50</sub>), while the binding affinity for D<sub>3</sub>R was 7.4 nM (K<sub>i</sub>) [8]. Further, 10 mg/kg oral dose of R-VK4-116 in rats showed C<sub>max</sub> 454.4 pM/mL [8]. Considering these concentrations, the *in vitro* concentration ( $\geq 10 \mu\text{M}$ ) that showed off-target effects in some assays will not be physiologically relevant. Although, these *in vitro* data are promising, this study has limitation of *in vivo* ADMET data. These *in vitro* results may not necessarily correlate with an *in vivo* result due to the absence of identical conditions for live organism's cell [63]. However, this *in vitro* study results will help to design the *in vivo* studies with appropriate endpoints. For further development, rat (rodent) and dog (non-rodent) species are selected for planned GLP *in vivo* safety studies as a part of investigational new drug application (IND) submission to support human clinical trials.

In conclusion, the results of these *in vitro* studies indicated that R-VK4-116 possesses favorable safety properties with low potential to cause off-target toxicity to support its further development as a medication for OUD.

## Supporting information

**S1 File. Additional tables and figures.**  
(DOCX)

## Acknowledgments

The authors would like to thank all team members of the project. The authors would like to thank Dr. Toufan Parman, Dr. Kalyani Jambunathan, Dr. Robert Swezey, Dr. Lalitha Iyer, Patricia Byrge, Anna Furimsky and Kathleen O'Loughlin for performing the study at Stanford Research Institute International (SRI), Menlo Park, CA, under the contract.

## Author Contributions

**Conceptualization:** Amy Hauck Newman, Pramod S. Terse.

**Data curation:** Rahul M. Nandre.

**Formal analysis:** Rahul M. Nandre, Amy Hauck Newman, Pramod S. Terse.

**Investigation:** Rahul M. Nandre, Pramod S. Terse.

**Methodology:** Rahul M. Nandre.

**Project administration:** Rahul M. Nandre, Pramod S. Terse.

**Resources:** Rahul M. Nandre, Amy Hauck Newman, Pramod S. Terse.

**Supervision:** Pramod S. Terse.

**Visualization:** Rahul M. Nandre, Pramod S. Terse.

**Writing – original draft:** Rahul M. Nandre.

**Writing – review & editing:** Amy Hauck Newman, Pramod S. Terse.

## References

1. Rasmussen K, White DA, Acri JB. NIDA's medication development priorities in response to the Opioid Crisis: ten most wanted. *Neuropsychopharmacology*. 2019; 44(4):657–9. Epub 2018/12/13. <https://doi.org/10.1038/s41386-018-0292-5> PMID: 30538289; PubMed Central PMCID: PMC6372702.
2. Galaj E, Newman AH, Xi ZX. Dopamine D3 receptor-based medication development for the treatment of opioid use disorder: Rationale, progress, and challenges. *Neurosci Biobehav Rev*. 2020; 114:38–52. Epub 2020/05/08. <https://doi.org/10.1016/j.neubiorev.2020.04.024> PMID: 32376243; PubMed Central PMCID: PMC7252042.
3. Keck TM, John WS, Czoty PW, Nader MA, Newman AH. Identifying Medication Targets for Psychostimulant Addiction: Unraveling the Dopamine D3 Receptor Hypothesis. *J Med Chem*. 2015; 58(14):5361–80. Epub 2015/04/01. <https://doi.org/10.1021/jm501512b> PMID: 25826710; PubMed Central PMCID: PMC4516313.
4. Appel NM, Li SH, Holmes TH, Acri JB. Dopamine D3 Receptor Antagonist (GSK598809) Potentiates the Hypertensive Effects of Cocaine in Conscious, Freely-Moving Dogs. *J Pharmacol Exp Ther*. 2015; 354(3):484–92. Epub 2015/07/15. <https://doi.org/10.1124/jpet.115.224121> PMID: 26177654; PubMed Central PMCID: PMC4538869.
5. Kumar V, Bonifazi A, Ellenberger MP, Keck TM, Pommier E, Rais R, et al. Highly Selective Dopamine D3 Receptor (D3R) Antagonists and Partial Agonists Based on Eticlopride and the D3R Crystal Structure: New Leads for Opioid Dependence Treatment. *J Med Chem*. 2016; 59(16):7634–50. Epub 2016/

- 08/11. <https://doi.org/10.1021/acs.jmedchem.6b00860> PMID: 27508895; PubMed Central PMCID: PMC5001167.
6. You ZB, Bi GH, Galaj E, Kumar V, Cao J, Gadiano A, et al. Dopamine D(3)R antagonist VK4-116 attenuates oxycodone self-administration and reinstatement without compromising its antinociceptive effects. *Neuropsychopharmacology*. 2019; 44(8):1415–24. Epub 2018/12/18. <https://doi.org/10.1038/s41386-018-0284-5> PMID: 30555159; PubMed Central PMCID: PMC6785005.
  7. de Guglielmo G, Kallupi M, Sedighim S, Newman AH, George O. Dopamine D(3) Receptor Antagonism Reverses the Escalation of Oxycodone Self-administration and Decreases Withdrawal-Induced Hyperalgesia and Irritability-Like Behavior in Oxycodone-Dependent Heterogeneous Stock Rats. *Front Behav Neurosci*. 2019; 13:292. Epub 2020/01/30. <https://doi.org/10.3389/fnbeh.2019.00292> PMID: 31992976; PubMed Central PMCID: PMC6971096.
  8. Shaik AB, Kumar V, Bonifazi A, Guerrero AM, Cemaj SL, Gadiano A, et al. Investigation of Novel Primary and Secondary Pharmacophores and 3-Substitution in the Linking Chain of a Series of Highly Selective and Bitopic Dopamine D(3) Receptor Antagonists and Partial Agonists. *J Med Chem*. 2019; 62(20):9061–77. Epub 2019/09/19. <https://doi.org/10.1021/acs.jmedchem.9b00607> PMID: 31526003; PubMed Central PMCID: PMC8830247.
  9. Jordan CJ, Humburg BA, Thorndike EB, Shaik AB, Xi ZX, Baumann MH, et al. Newly Developed Dopamine D(3) Receptor Antagonists, R-VK4-40 and R-VK4-116, Do Not Potentiate Cardiovascular Effects of Cocaine or Oxycodone in Rats. *J Pharmacol Exp Ther*. 2019; 371(3):602–14. Epub 2019/09/29. <https://doi.org/10.1124/jpet.119.259390> PMID: 31562201; PubMed Central PMCID: PMC6863462.
  10. Tashkandi H, Chaparala A, Peng S, Nagarkatti M, Nagarkatti P, Chumanevich AA, et al. Pharmacokinetics of Panaxynol in Mice. *J Cancer Sci Clin Ther*. 2020; 4(2):133–43. Epub 2020/09/10. <https://doi.org/10.26502/jcsct.5079059> PMID: 32905447; PubMed Central PMCID: PMC7472592.
  11. Bonn B, Svanberg P, Janefeldt A, Hultman I, Grime K. Determination of Human Hepatocyte Intrinsic Clearance for Slowly Metabolized Compounds: Comparison of a Primary Hepatocyte/Stromal Cell Co-culture with Plated Primary Hepatocytes and HepaRG. *Drug Metab Dispos*. 2016; 44(4):527–33. Epub 2016/02/07. <https://doi.org/10.1124/dmd.115.067769> PMID: 26851239.
  12. USFDA. In vitro drug interaction studies-cytochrome P450 enzyme- and transporter-mediated drug interactions. Guidance for industry Draft Guidance Center for Drug Evaluation and Research (CDER). 2020.
  13. Kostrubsky VE, Ramachandran V, Venkataramanan R, Dorko K, Esplen JE, Zhang S, et al. The use of human hepatocyte cultures to study the induction of cytochrome P-450. *Drug Metab Dispos*. 1999; 27(8):887–94. Epub 1999/07/27. PMID: 10421615.
  14. Chu V, Einolf HJ, Evers R, Kumar G, Moore D, Ripp S, et al. In vitro and in vivo induction of cytochrome p450: a survey of the current practices and recommendations: a pharmaceutical research and manufacturers of america perspective. *Drug Metab Dispos*. 2009; 37(7):1339–54. Epub 2009/04/25. <https://doi.org/10.1124/dmd.109.027029> PMID: 19389860.
  15. EMA. Guideline on the investigation of drug interactions. 2012.
  16. Ichikawa M, Akamine H, Murata M, Ito S, Takayama K, Mizuguchi H. Generation of tetracycline-controllable CYP3A4-expressing Caco-2 cells by the piggyBac transposon system. *Sci Rep*. 2021; 11(1):11670. Epub 2021/06/05. <https://doi.org/10.1038/s41598-021-91160-z> PMID: 34083621; PubMed Central PMCID: PMC8175591.
  17. Jaworski S, Strojny B, Sawosz E, Wierzbicki M, Grodzik M, Kutwin M, et al. Degradation of Mitochondria and Oxidative Stress as the Main Mechanism of Toxicity of Pristine Graphene on U87 Glioblastoma Cells and Tumors and HS-5 Cells. *Int J Mol Sci*. 2019; 20(3). Epub 2019/02/06. <https://doi.org/10.3390/ijms20030650> PMID: 30717385; PubMed Central PMCID: PMC6386908.
  18. Woo JH, Seo HJ, Lee JY, Lee I, Jeon K, Kim B, et al. Polypropylene nanoplastic exposure leads to lung inflammation through p38-mediated NF-kappaB pathway due to mitochondrial damage. *Part Fibre Toxicol*. 2023; 20(1):2. Epub 2023/01/10. <https://doi.org/10.1186/s12989-022-00512-8> PMID: 36624477; PubMed Central PMCID: PMC9829531.
  19. Jiang F, Zhu T, Yang C, Chen Y, Fu Z, Jiang L, et al. Pachymic Acid Inhibits Growth and Metastatic Potential in Liver Cancer HepG2 and Huh7 Cells. *Biol Pharm Bull*. 2023; 46(1):35–41. Epub 2022/10/24. <https://doi.org/10.1248/bpb.b22-00440> PMID: 36273899.
  20. Polonikov A, Bocharova I, Azarova I, Klyosova E, Bykanova M, Bushueva O, et al. The Impact of Genetic Polymorphisms in Glutamate-Cysteine Ligase, a Key Enzyme of Glutathione Biosynthesis, on Ischemic Stroke Risk and Brain Infarct Size. *Life (Basel)*. 2022; 12(4). Epub 2022/04/24. <https://doi.org/10.3390/life12040602> PMID: 35455093; PubMed Central PMCID: PMC9032935.
  21. Chen PH, Lai YH, Shih HY, Huang WC, Yang HY. Dietary dehulled adlay ameliorated alcoholic liver disease progression by modulating oxidative stress, inflammation, and gut-liver axis disruption in rats. *J*

- Funct Foods. 2023;108. ARTN 105759, <https://doi.org/10.1016/j.jff.2023.105759> WOS:001072025200001.
22. Fabian MA, Biggs WH 3rd, Treiber DK, Atteridge CE, Azimioara MD, Benedetti MG, et al. A small molecule-kinase interaction map for clinical kinase inhibitors. *Nat Biotechnol.* 2005; 23(3):329–36. Epub 2005/02/16. <https://doi.org/10.1038/nbt1068> PMID: 15711537.
  23. Karaman MW, Herrgard S, Treiber DK, Gallant P, Atteridge CE, Campbell BT, et al. A quantitative analysis of kinase inhibitor selectivity. *Nat Biotechnol.* 2008; 26(1):127–32. Epub 2008/01/10. <https://doi.org/10.1038/nbt1358> PMID: 18183025.
  24. Hill AV. The possible effects of the aggregation of the molecules of hemoglobin on its dissociation curves. *J Physiol (Lond)* 1910; 40,(iv-vii).
  25. Levenberg K. A method for the solution of certain non-linear problems in least squares. *Q Appl Math* 1944; 2,:164–8
  26. Lawn W, Freeman TP, East K, Gaule A, Aston ER, Bloomfield MAP, et al. The Acute Effects of a Dopamine D<sub>3</sub> Receptor Preferring Agonist on Motivation for Cigarettes in Dependent and Occasional Cigarette Smokers. *Nicotine Tob Res.* 2018; 20(7):800–9. <https://doi.org/10.1093/ntr/ntx159> PMID: 29065193; PubMed Central PMCID: PMC5991206.
  27. Newton TF, Haile CN, Mahoney JJ 3rd, Shah R, Verrico CD, De La Garza R, 2nd, et al. Dopamine D<sub>3</sub> receptor-preferring agonist enhances the subjective effects of cocaine in humans. *Psychiatry Res.* 2015; 230(1):44–9. Epub 20150729. <https://doi.org/10.1016/j.psychres.2015.07.073> PMID: 26239766; PubMed Central PMCID: PMC4584195.
  28. Thomsen M, Barrett AC, Butler P, Negus SS, Caine SB. Effects of Acute and Chronic Treatments with Dopamine D<sub>2</sub>(2) and D<sub>3</sub>(3) Receptor Ligands on Cocaine versus Food Choice in Rats. *J Pharmacol Exp Ther.* 2017; 362(1):161–76. Epub 20170504. <https://doi.org/10.1124/jpet.117.241141> PMID: 28473458; PubMed Central PMCID: PMC5469403.
  29. Appel NM, Acri JB Cardiovascular safety studies on dopamine D<sub>3</sub> receptor antagonists and cocaine. Safety Pharmacology Society, Berlin, Germany.2017.
  30. Gross G. Strategies for Enhancing Oral Bioavailability and Brain Penetration. 4th ed 2015.
  31. Odilia Osakwe SAAR. Social Aspects of Drug Discovery, Development and Commercialization 2016.
  32. USFDA. M3(R2) Nonclinical Safety Studies for the Conduct of Human Clinical Trials and Marketing Authorization for Pharmaceuticals. 2010.
  33. Obach RS, Baxter JG, Liston TE, Silber BM, Jones BC, MacIntyre F, et al. The prediction of human pharmacokinetic parameters from preclinical and in vitro metabolism data. *J Pharmacol Exp Ther.* 1997; 283(1):46–58. Epub 1997/10/23. PMID: 9336307.
  34. Rodrigues AD, Rushmore TH. Cytochrome P450 pharmacogenetics in drug development: in vitro studies and clinical consequences. *Curr Drug Metab.* 2002; 3(3):289–309. Epub 2002/06/27. <https://doi.org/10.2174/1389200023337522> PMID: 12083322.
  35. Nakamura K, Goto F, Ray WA, McAllister CB, Jacqz E, Wilkinson GR, et al. Interethnic differences in genetic polymorphism of debrisoquin and mephenytoin hydroxylation between Japanese and Caucasian populations. *Clin Pharmacol Ther.* 1985; 38(4):402–8. Epub 1985/10/01. <https://doi.org/10.1038/clpt.1985.194> PMID: 4042523.
  36. Hakkola J, Hukkanen J, Turpeinen M, Pelkonen O. Inhibition and induction of CYP enzymes in humans: an update. *Arch Toxicol.* 2020; 94(11):3671–722. Epub 2020/10/29. <https://doi.org/10.1007/s00204-020-02936-7> PMID: 33111191; PubMed Central PMCID: PMC7603454.
  37. Konig J, Muller F, Fromm MF. Transporters and drug-drug interactions: important determinants of drug disposition and effects. *Pharmacol Rev.* 2013; 65(3):944–66. Epub 2013/05/21. <https://doi.org/10.1124/pr.113.007518> PMID: 23686349.
  38. Muller F, Fromm MF. Transporter-mediated drug-drug interactions. *Pharmacogenomics.* 2011; 12(7):1017–37. Epub 2011/07/27. <https://doi.org/10.2217/pgs.11.44> PMID: 21787191.
  39. Deng F, Sjostedt N, Santo M, Neuvonen M, Niemi M, Kidron H. Novel inhibitors of breast cancer resistance protein (BCRP, ABCG2) among marketed drugs. *Eur J Pharm Sci.* 2023; 181:106362. Epub 2022/12/19. <https://doi.org/10.1016/j.ejps.2022.106362> PMID: 36529162.
  40. Shapiro LE SM, Shear NH. Pharmacokinetic mechanisms of drug-drug and drug-food interactions in dermatology. *Curr Opin Dermatol* 1997; 4:25–31.
  41. Shapiro LE, Knowles SR, Shear NH. Drug Interactions. *Comprehensive Dermatologic Drug Therapy.* Fourth ed: Elsevier; 2021. p. 725–42.
  42. Trainor GL. The importance of plasma protein binding in drug discovery. *Expert Opin Drug Discov.* 2007; 2(1):51–64. Epub 2007/01/01. <https://doi.org/10.1517/17460441.2.1.51> PMID: 23496037.

43. Held P, Newick K, Shen D, Patton W. Automated Detection of Drug-Induced Lysosomal Cytotoxicity—Automation of the Lyso-ID Red Assay Using the EL406 Combination Washer Dispenser. *Lab Manager*. 2010;pp. 1–6.
44. Donato MT, Gomez-Lechon MJ. Drug-induced liver steatosis and phospholipidosis: cell-based assays for early screening of drug candidates. *Curr Drug Metab*. 2012; 13(8):1160–73. Epub 2012/07/04. <https://doi.org/10.2174/138920012802850001> PMID: 22746303.
45. Nunnari J, Suomalainen A. Mitochondria: in sickness and in health. *Cell*. 2012; 148(6):1145–59. Epub 2012/03/20. <https://doi.org/10.1016/j.cell.2012.02.035> PMID: 22424226; PubMed Central PMCID: PMC5381524.
46. Scheffler IE. A century of mitochondrial research: achievements and perspectives. *Mitochondrion*. 2001; 1(1):3–31. Epub 2005/08/27. [https://doi.org/10.1016/s1567-7249\(00\)00002-7](https://doi.org/10.1016/s1567-7249(00)00002-7) PMID: 16120266.
47. Eakins J, Bauch C, Woodhouse H, Park B, Bevan S, Dilworth C, et al. A combined in vitro approach to improve the prediction of mitochondrial toxicants. *Toxicol In Vitro*. 2016; 34:161–70. Epub 2016/04/17. <https://doi.org/10.1016/j.tiv.2016.03.016> PMID: 27083147.
48. Ardito F, Giuliani M, Perrone D, Troiano G, Lo Muzio L. The crucial role of protein phosphorylation in cell signaling and its use as targeted therapy (Review). *Int J Mol Med*. 2017; 40(2):271–80. Epub 2017/06/29. <https://doi.org/10.3892/ijmm.2017.3036> PMID: 28656226; PubMed Central PMCID: PMC5500920.
49. Patterson H, Nibbs R, McInnes I, Siebert S. Protein kinase inhibitors in the treatment of inflammatory and autoimmune diseases. *Clin Exp Immunol*. 2014; 176(1):1–10. Epub 2013/12/10. <https://doi.org/10.1111/cei.12248> PMID: 24313320; PubMed Central PMCID: PMC3958149.
50. Burke JE. Structural Basis for Regulation of Phosphoinositide Kinases and Their Involvement in Human Disease. *Mol Cell*. 2018; 71(5):653–73. Epub 2018/09/08. <https://doi.org/10.1016/j.molcel.2018.08.005> PMID: 30193094.
51. Maureen O'Donnell, Jennifer Axilbund, Euhus DM. Breast Cancer Genetics: Syndromes, Genes, Pathology, Counseling, Testing, and Treatment. *The Breast*. Fifth ed 2018.
52. Wang H, Moniruzzaman R, Li L, Ji B, Liu Y, Zuo X, et al. Hematopoietic progenitor kinase 1 inhibits the development and progression of pancreatic intraepithelial neoplasia. *J Clin Invest*. 2023; 133(12). Epub 2023/05/04. <https://doi.org/10.1172/JCI163873> PMID: 37140994; PubMed Central PMCID: PMC10266776.
53. Yang J, Niu H, Pang S, Liu M, Chen F, Li Z, et al. MARK3 kinase: Regulation and physiologic roles. *Cell Signal*. 2023; 103:110578. Epub 2022/12/30. <https://doi.org/10.1016/j.cellsig.2022.110578> PMID: 36581219.
54. Wang HY, Lin W, Dyck JA, Yeakley JM, Songyang Z, Cantley LC, et al. SRPK2: a differentially expressed SR protein-specific kinase involved in mediating the interaction and localization of pre-mRNA splicing factors in mammalian cells. *J Cell Biol*. 1998; 140(4):737–50. Epub 1998/03/21. <https://doi.org/10.1083/jcb.140.4.737> PMID: 9472028; PubMed Central PMCID: PMC2141757.
55. Chan TY, Egbert CM, Maxson JE, Siddiqui A, Larsen LJ, Kohler K, et al. TNK1 is a ubiquitin-binding and 14-3-3-regulated kinase that can be targeted to block tumor growth. *Nat Commun*. 2021; 12(1):5337. Epub 2021/09/11. <https://doi.org/10.1038/s41467-021-25622-3> PMID: 34504101; PubMed Central PMCID: PMC8429728 Dainippon Pharma Oncology. Authors affiliated with Sumitomo Dainippon Pharma Oncology have a financial stake in the development of the TNK1 inhibitor. The remaining authors declare no competing interests.
56. Lloyd MD. High-Throughput Screening for the Discovery of Enzyme Inhibitors. *J Med Chem*. 2020; 63(19):10742–72. Epub 2020/05/21. <https://doi.org/10.1021/acs.jmedchem.0c00523> PMID: 32432874.
57. LiverTox. Clinical and Research Information on Drug-Induced Liver Injury [Internet]. Bethesda (MD): National Institute of Diabetes and Digestive and Kidney Diseases; 2012-. Alpha 1 Adrenergic Receptor Antagonists. <https://www.ncbi.nlm.nih.gov/books/NBK548719/2018>.
58. Estelle F, Simons R. H1-receptor antagonists: safety issues. *Ann Allergy Asthma Immunol*. 1999; 83(5):481–8. Epub 1999/12/03. [https://doi.org/10.1016/s1081-1206\(10\)62855-4](https://doi.org/10.1016/s1081-1206(10)62855-4) PMID: 10582735.
59. Mihic SJ, Harris RA. GABA and the GABAA receptor. *Alcohol Health Res World*. 1997; 21(2):127–31. Epub 1997/01/01. PMID: 15704348; PubMed Central PMCID: PMC6826832.
60. Colatsky T, Fermi B, Gintant G, Pierson JB, Sager P, Sekino Y, et al. The Comprehensive in Vitro Proarrhythmia Assay (CiPA) initiative—Update on progress. *J Pharmacol Toxicol Methods*. 2016; 81:15–20. Epub 2016/06/11. <https://doi.org/10.1016/j.vascn.2016.06.002> PMID: 27282641.
61. Butler A, Helliwell MV, Zhang Y, Hancox JC, Dempsey CE. An Update on the Structure of hERG. *Front Pharmacol*. 2019; 10:1572. Epub 2020/02/11. <https://doi.org/10.3389/fphar.2019.01572> PMID: 32038248; PubMed Central PMCID: PMC6992539.

62. Hibino H, Inanobe A, Furutani K, Murakami S, Findlay I, Kurachi Y. Inwardly rectifying potassium channels: their structure, function, and physiological roles. *Physiol Rev.* 2010; 90(1):291–366. Epub 2010/01/21. <https://doi.org/10.1152/physrev.00021.2009> PMID: 20086079.
63. Graudejus O PWR, Varghese N, Wagner S and Morrison B, editor Bridging the gap between in vivo and in vitro research: Reproducing in vitro the mechanical and electrical environment of cells in vivo. 11th International Meeting on Substrate Integrated Microelectrode Arrays.; 2018; Reutlingen, Germany.
